# Supplementary material for: Identification of new biomarkers to promote personalised treatment of patients with inflammatory rheumatic disease: protocol for an open cohort study
Source: PubMed Central journal article supplement — BMJ Open. 2018 Feb 1;8(2):e019325. doi: 10.1136/bmjopen-2017-019325 (PMC5829933; doi:10.1136/bmjopen-2017-019325), 2018-02-01
Supplement: bmjopen-2017-019325.draft_revisions.pdf [file bmjopen-2017-019325.draft_revisions.pdf]

# BMJ Open

BMJ Open is committed to open peer review. As part of this commitment we make the peer review history of every article we publish publicly available.

When an article is published we post the peer reviewers' comments and the authors' responses online. We also post the versions of the paper that were used during peer review. These are the versions that the peer review comments apply to.

The versions of the paper that follow are the versions that were submitted during the peer review process. They are not the versions of record or the final published versions. They should not be cited or distributed as the published version of this manuscript.

BMJ Open is an open access journal and the full, final, typeset and author-corrected version of record of the manuscript is available on our site with no access controls, subscription charges or pay-per-view fees (<http://bmjopen.bmj.com>).

If you have any questions on BMJ Open's open peer review process please email [editorial.bmjopen@bmj.com](mailto:editorial.bmjopen@bmj.com)

# BMJ Open

## Identification of new biomarkers to promote personalized treatment of patients with inflammatory rheumatic disease, an open cohort study

|                                 |                                                                                                                                                                                                                                                                                                                                                                                                                                                                                                                                                                                                                                                                                                                                                                                                                                                                                                                                                                                                                                                                                                                                                                                                                                      |
|---------------------------------|--------------------------------------------------------------------------------------------------------------------------------------------------------------------------------------------------------------------------------------------------------------------------------------------------------------------------------------------------------------------------------------------------------------------------------------------------------------------------------------------------------------------------------------------------------------------------------------------------------------------------------------------------------------------------------------------------------------------------------------------------------------------------------------------------------------------------------------------------------------------------------------------------------------------------------------------------------------------------------------------------------------------------------------------------------------------------------------------------------------------------------------------------------------------------------------------------------------------------------------|
| Journal:                        | <i>BMJ Open</i>                                                                                                                                                                                                                                                                                                                                                                                                                                                                                                                                                                                                                                                                                                                                                                                                                                                                                                                                                                                                                                                                                                                                                                                                                      |
| Manuscript ID                   | bmjopen-2017-019325                                                                                                                                                                                                                                                                                                                                                                                                                                                                                                                                                                                                                                                                                                                                                                                                                                                                                                                                                                                                                                                                                                                                                                                                                  |
| Article Type:                   | Protocol                                                                                                                                                                                                                                                                                                                                                                                                                                                                                                                                                                                                                                                                                                                                                                                                                                                                                                                                                                                                                                                                                                                                                                                                                             |
| Date Submitted by the Author:   | 26-Aug-2017                                                                                                                                                                                                                                                                                                                                                                                                                                                                                                                                                                                                                                                                                                                                                                                                                                                                                                                                                                                                                                                                                                                                                                                                                          |
| Complete List of Authors:       | <p>Kringelbach, Tina; Copenhagen University Hospital Herlev, Bio- and Genome Bank Denmark and the Danish Rheumatologic Biobank, The Molecular Unit, Department of Pathology</p> <p>Glintborg, B.; Rigshospitalet Glostrup, Copenhagen Centre for Arthritis Research, Center for Rheumatology and Spine Diseases, the Danish DANBIO Registry, and the Danish Rheumatologic Biobank</p> <p>Hoegdall, Estrid; Copenhagen University Hospital Herlev, Bio- and Genome Bank Denmark and the Danish Rheumatologic Biobank, The Molecular Unit, Department of Pathology; University of Copenhagen, Department of Clinical Medicine, Faculty of Health and Medical Sciences</p> <p>Johansen, Julia; Copenhagen University Hospital Herlev, Departments of Medicine and Oncology, and the Danish Rheumatologic Biobank; University of Copenhagen, Department of Clinical Medicine, Faculty of Health and Medical Sciences</p> <p>Lund Hetland, Merete; Rigshospitalet Glostrup, Copenhagen Centre for Arthritis Research, Center for Rheumatology and Spine Diseases, the Danish DANBIO Registry, and the Danish Rheumatologic Biobank; University of Copenhagen, Department of Clinical Medicine, Faculty of Health and Medical Sciences</p> |
| <b>Primary Subject Heading</b>: | Rheumatology                                                                                                                                                                                                                                                                                                                                                                                                                                                                                                                                                                                                                                                                                                                                                                                                                                                                                                                                                                                                                                                                                                                                                                                                                         |
| Secondary Subject Heading:      | Epidemiology                                                                                                                                                                                                                                                                                                                                                                                                                                                                                                                                                                                                                                                                                                                                                                                                                                                                                                                                                                                                                                                                                                                                                                                                                         |
| Keywords:                       | Inflammatory rheumatic disease, Personalised treatment, Biomarkers, Danish Rheumatologic Biobank, DANBIO, RHEUMATOLOGY                                                                                                                                                                                                                                                                                                                                                                                                                                                                                                                                                                                                                                                                                                                                                                                                                                                                                                                                                                                                                                                                                                               |
|                                 |                                                                                                                                                                                                                                                                                                                                                                                                                                                                                                                                                                                                                                                                                                                                                                                                                                                                                                                                                                                                                                                                                                                                                                                                                                      |

SCHOLARONE™  
Manuscripts

1  
2  
3  
4 **Identification of new biomarkers to promote personalized treatment of patients with inflammatory**  
5 **rheumatic disease, an open cohort study**  
6  
7

8 **Running title:** A Rheumatologic Biomarker Protocol  
9

10  
11 T M Kringelbach<sup>1,2</sup>, B Glintborg<sup>1,3,4</sup>, E V Høgdall<sup>1,2,5</sup>, J Johansen<sup>1,5,6</sup>, M L Hetland<sup>1,3,4,5</sup>, and The Biomarker  
12 Protocol Study Group<sup>7</sup>  
13

14  
15  
16 T M Kringelbach and B Glintborg contributed equally to this paper and share first co-authorship  
17

18  
19 <sup>1</sup>The Danish Rheumatologic Biobank

20 <sup>2</sup>Bio- and Genome Bank Denmark, The Molecular Unit, Department of Pathology, Copenhagen University  
21 Hospital Herlev, Herlev, Denmark  
22

23 <sup>3</sup>Copenhagen Centre for Arthritis Research, Center for Rheumatology and Spine Diseases, Rigshospitalet,  
24 Glostrup, Denmark  
25

26 <sup>4</sup>The Danish DANBIO registry, Rigshospitalet, Glostrup, Denmark  
27

28 <sup>5</sup>Department of Clinical Medicine, Faculty of Health and Medical Sciences, University of Copenhagen,  
29 Copenhagen, Denmark  
30

31 <sup>6</sup>Departments of Medicine and Oncology, Copenhagen University Hospital Herlev, Herlev, Denmark  
32

33 <sup>7</sup>The Biomarker Protocol Study Group is defined under acknowledgements  
34

35 ClinicalTrials.gov ID: NCT03214263  
36  
37

38 **Corresponding author:** Merete L. Hetland, Department of Rheumatology, Rigshospitalet Glostrup,  
39 Glostrup, Denmark, phone: 0045-38633330, e-mail: merete.hetland@dadlnet.dk  
40  
41

42 **Author disclosures:**

43  
44 B Glintborg: Biogen, AbbVie

45 M L Hetland: Orion, BMS, AbbVie, Biogen, Pfizer, MSD, Roche, Celltrion, Crescendo, UCB

46  
47 The remaining authors: none declared  
48  
49

50 **Word count:**

51 **Abstract:** 288 words

52  
53 **Text:** 3,638 words  
54  
55  
56  
57  
58

## ABSTRACT

**Introduction:** The medical treatment of inflammatory rheumatic diseases has improved dramatically during the last decades primarily due to the introduction of biological disease modifying anti-rheumatic drugs (bDMARDs). However, bDMARD treatment failure occurs in 30-40% of patients due to lack of effect or adverse events, and the tools to predict treatment outcomes in individual patients are currently limited. The objective of the present study is to identify diagnostic, prognostic and predictive biomarkers, which can be used to 1) diagnose inflammatory rheumatic diseases early in the disease course with high sensitivity and specificity, 2) improve prognostication, or 3) predict and monitor treatment effectiveness and tolerability for the individual patient.

**Methods and analysis:** Observational and translational open cohort study with prospective collection of clinical data and biological materials (primarily blood) in patients with inflammatory rheumatic diseases treated in routine care. Patients contribute with one cross-sectional blood sample (i.e. EDTA whole blood, plasma and buffy coat, serum, and blood in PAXgene RNA tubes), and/or are enrolled for longitudinal follow-up upon initiation of a new DMARD (blood sampling after 0, 3, 6, 12, 24, 36, 48, 60 months of treatment). Other biological materials will be collected when accessible and relevant. Demographics, disease characteristics, comorbidities, and lifestyle factors are registered at inclusion; DMARD treatment and outcomes are collected repeatedly during follow-up. Currently (July 2017), >5,000 samples from ≈3,000 patients have been collected. Data will be analysed using appropriate statistical analyses.

**Ethics and dissemination:** The protocol is approved by the Danish Ethics Committee and The Danish Data Protection Agency. Participants give written and oral informed consent. Biomarkers will be evaluated and published according to REMARK, STROBE, and STARD guidelines. Results will be published in peer-reviewed scientific journals and presented at international conferences.

ClinicalTrials.gov ID: NCT03214263

#### Strengths and limitations of this study

- Nation-wide collection of biological materials and corresponding extensive clinical data provides the opportunity to discover and/or validate a wide range of diagnostic, prognostic, and predictive biomarkers in patients with inflammatory rheumatic disease
- Recruitment of patients treated in routine care is expected to provide valuable data on “real life patients” (e.g. elderly patients with comorbidities), which are different from the more homogeneous patient population in randomised controlled trials
- Standardised collection of samples and quality control ensures comparability between samples from different departments, and enables research in less common rheumatic diseases
- Patient recruitment and follow-up in routine care and across several rheumatic diagnoses and treatments will be associated with some limitations in clinical and biological data
- The non-randomised study design inherits a risk of confounding and thorough statistical analysis and confounder adjustment is therefore important

## INTRODUCTION

Rheumatoid arthritis (RA), psoriatic arthritis (PsA), and axial spondyloarthritis (AxSpA) are examples of chronic inflammatory rheumatic diseases characterised by pain, disability, and progressive decrease in workability, and are associated with comorbidity and risk of early death [1,2]. The impact of these chronic diseases on the patients should be minimized through early diagnosis followed by targeted therapy with minimal side effects. If and when remission is achieved, the patient has the potential to maintain a life with few restrictions – a desirable outcome both for the patient and for society.

The medical treatment of inflammatory rheumatic diseases has improved dramatically during the last decades. This is mainly due to an increased acknowledgement of the treat-to-target concept with conventional synthetic disease modifying anti-rheumatic drugs (csDMARDs) in RA, which implies strict monitoring and aggressive treatment strategies with add-on or switching of therapy according to clinical response or side effects [3–5]. Furthermore, the biological DMARDs (bDMARDs), e.g. tumour necrosis factor alpha inhibitors, or other specific modulators of inflammatory signal transduction, have improved outcomes for patients otherwise refractory to treatment with csDMARDs [4]. New treatment modalities including targeted synthetic DMARDs (tsDMARDs, e.g. Janus Kinase (JAK) inhibitors) are being introduced, and the first biosimilar bDMARDs have been marketed. Biological DMARDs and JAK inhibitors are expensive, and treatment failure, defined as lack of effect or serious adverse events, occurs in 30-40% of patients treated with bDMARDs [6,7]. Tools to predict treatment outcomes and side effects in the individual patient are currently limited [8].

In 1998, the National Institutes of Health Biomarkers Definitions Working Group defined a biomarker as “a characteristic that is objectively measured and evaluated as an indicator of normal biological processes, pathogenic processes, or pharmacologic responses to a therapeutic intervention” [9,10]. Biomarkers are divided in three categories: 1) diagnostic biomarkers, which may be used for early diagnosis of a given disease [11,12]. The ideal diagnostic biomarker should establish the correct diagnosis with high sensitivity and specificity; 2) prognostic biomarkers, which correlate with specific clinical outcomes, and thus progression of disease, regardless of any treatment; and 3) predictive biomarkers, which may be used to predict whether a given patient may benefit from a given treatment [13,14]. Hence, biomarkers may be

1  
2  
3  
4 promising tools to personalise the treatment of patients with inflammatory rheumatic disease. Biomarkers in  
5 blood and tissue include a wide range of molecules with different characteristics such as DNA, single  
6 nucleotide polymorphisms (SNPs), RNA, microRNA (miRNA), proteins, and metabolites. Genetic variation  
7 can be caused by SNPs and Copy Number Variations (CNVs), among which the SNP is the most common  
8 type of genetic variation [15–19]. MicroRNAs are small single-stranded, endogenous, non-coding RNAs  
9 (18-25 nucleotides) and play essential roles in regulating gene expression, cell development, differentiation,  
10 and proliferation [19–21]. The human proteome constitute all expressed human proteins and reflects the  
11 biological activity of the patient, and proteomics is increasingly used to investigate treatment response  
12 [22,23] or to stratify responding versus non-responding patients [24,25]. The metabolome is defined as the  
13 complete set of metabolites <1500 Da found in a given biological sample. It is a dynamic entity, which  
14 reflects the interaction between the individual genetic background and factors such as pathophysiological  
15 conditions, diet, and pharmacologic treatment [26]. In patients with RA, PsA, and AxSpA these biomarkers  
16 may be related to the disease itself, the associated inflammation or treatment-related pharmacokinetics.  
17 Biomarkers can be detected in peripheral blood, synovial fluid, circulating cells or cell-free DNA in plasma,  
18 or in tissue (e.g. cartilage, bone, and synovial membrane).

19  
20  
21  
22  
23  
24  
25  
26  
27  
28  
29  
30  
31  
32  
33  
34  
35  
36  
37  
38  
39  
40  
41  
42  
43  
44  
45  
46  
47  
48  
49  
50  
51  
52  
53  
54  
55  
56  
57  
58  
59  
60  
Currently, some biomarkers are used as part of the classification of arthritis patients, e.g., IgM  
rheumatoid factor (IgM-RF), anti-citrullinated protein antibodies (anti-CCP), C-reactive protein (CRP) and  
human leukocyte antigen B27 (HLA-B27) [27–29]. However, for individual patients, these few biomarkers  
cannot differentiate a patient from a healthy subject with high specificity or predict mild versus severe  
disease. Radiographic imaging is used routinely to assess cumulated joint damage, however, biomarkers  
have the potential of being a more feasible, specific, and reproducible tool for both diagnostic and prognostic  
purposes and for the monitoring of treatment and disease progression.

The present protocol is an observational, prospective, translational research study of rheumatologic  
patients followed in the nationwide Danish DANBIO registry [30] and the Danish Rheumatologic Biobank  
[31,32]. The objective is to identify new diagnostic, prognostic and predictive biomarkers, which can be used  
to 1) diagnose inflammatory rheumatic diseases early in the disease course with high sensitivity and  
specificity, 2) predict patient prognosis regardless of treatment, or 3) predict and monitor the effective

1  
2  
3  
4 treatment for the individual patient with minimised risk of side effects. This protocol has been prepared and  
5 presented according to the REMARK and STROBE guidelines [13,33].  
6  
7  
8  
9

## 10 **MATERIALS AND METHODS**

### 11 **Study design and setting**

12  
13 Biological samples and clinical data are collected prospectively in rheumatic patients treated in routine care.  
14  
15 Clinical data and outcomes are registered in the Danish nationwide quality registry DANBIO [30,34] and  
16  
17 biological samples are collected via the Danish Rheumatologic Biobank [31,32]. Patient inclusion started in  
18  
19 May 2015 and will continue until 2025 with follow-up until 2030. If needed, the inclusion period can be  
20  
21 expanded.  
22

23  
24 DANBIO was established in year 2000 and data collection occurs prospectively by a web-based  
25  
26 system used in routine care at Danish hospital Departments of Rheumatology and in primary care (private  
27  
28 practising specialists of rheumatology). It is mandatory to monitor patients with inflammatory rheumatic  
29  
30 diseases treated with bDMARDs and patients with newly diagnosed RA irrespective of treatment [34]. Data  
31  
32 registered in DANBIO are listed in the “Clinical data” section below. DANBIO represents an excellent tool  
33  
34 for monitoring patients in routine care and for research purposes.

35  
36 The Danish Rheumatologic Biobank was established in 2015 through nationwide collaboration  
37  
38 between Departments of Rheumatology and Departments of Clinical Biochemistry in Denmark. The Danish  
39  
40 Rheumatologic Biobank is organised according to the infrastructure of the well-established Danish  
41  
42 CancerBiobank [31], and both biobanks are part of the Bio- and Genome Bank Denmark funded by Danish  
43  
44 Regions (the governmental organisation who runs the public hospitals in DK). The foundation of the Danish  
45  
46 Rheumatologic Biobank was funded by the Danish Rheumatism Association and Danish Regions. By June  
47  
48 1<sup>st</sup>, 2017, 12 hospitals from all parts of Denmark (Rigshospitalet; North Denmark Regional Hospital; King  
49  
50 Christian 10<sup>th</sup> Hospital for Rheumatic Diseases, Graasten; Aarhus University Hospital; Copenhagen  
51  
52 University Hospital, Gentofte; Zealand University Hospital, Køge; OUH Svendborg Hospital; Odense  
53  
54 University Hospital; Aalborg University Hospital; Hospital Lillebaelt, Vejle; Randers Regional Hospital; and  
55  
56 University Hospital Bispebjerg and Frederiksberg) participated in the Danish Rheumatologic Biobank, and  
57  
58



1  
2  
3  
4 additional hospitals are continuously joining. Different types of biological material (e.g. blood, tissue,  
5 synovial fluid, and urine) are collected, handled and stored according to nationally approved Standard  
6 Operating Procedures (SOPs) [31] (see section “Biological Samples”).  
7

8  
9  
10 Patients contribute primarily with blood samples, but also other types of biological materials (synovial  
11 fluid and surgical tissue), when these are accessible and relevant. Patients contribute with one or more of the  
12 following samples: 1) cross-sectional blood samples: patients provide one cross-sectional sample when they  
13 meet for a scheduled routine clinical visit (Figure 1A); 2) longitudinal blood samples: patients may be  
14 enrolled for longitudinal follow-up when they start treatment with a new DMARD. Switching from  
15 csDMARD to bDMARD, or from one bDMARD to another bDMARD, indicates a new baseline sample  
16 (Figure 1B); and 3) other biological materials: Patients may contribute with representative samples of  
17 biologic material if they are scheduled for joint puncture with aspiration (synovial fluid), surgery, or biopsies  
18 (synovia, cartilage, bone, bone-marrow or other tissues). Cross-sectional sampling may be done at any given  
19 disease stage and at any time point during treatment. Longitudinal blood samples are collected at baseline  
20 and after 3, 6, 12, 24, 36, 48 and 60 months of treatment. In case of serious adverse events or treatment  
21 withdrawal, additional blood sampling is performed (Figure 1B). Approximately half of the material will be  
22 used for the present study. The other half can be made available, according to guidelines in the Bio- and  
23 Genome Bank Denmark, to other researchers who wish to cooperate.  
24  
25  
26  
27  
28  
29  
30  
31  
32  
33  
34  
35  
36

37 The present protocol is designed to investigate a broad range of biomarkers in patients with  
38 inflammatory rheumatic diseases. One of the first longitudinal cohorts in the study included patients who  
39 switched from originator Infliximab (IFX, Remicade) to biosimilar IFX (CT-P13, Remsima). According to  
40 national guidelines issued in 2015, all Danish patients diagnosed with inflammatory rheumatic diseases (RA,  
41 PsA, or AxSpA), and treated with originator IFX, were switched to CT-P13 [35]. In association with this  
42 non-medical switch, the aim was to investigate the following biomarkers and clinical outcome: 1) effects of  
43 the switch on serum IFX (sIFX) and presence of anti-drug antibodies (ADA), and 2) association between  
44 sIFX and ADA at the time of switch on adherence to CT-P13 treatment [36]. Clinical data and longitudinal  
45 blood samples were collected as described in the present protocol.  
46  
47  
48  
49  
50  
51  
52  
53  
54  
55  
56  
57  
58  
59

## Participants

The Biomarker Protocol is an open cohort study, i.e., participants may enter and leave the population at different time points during monitoring. Patients are eligible for inclusion if they are followed in routine care and monitored in DANBIO with one of the following diagnoses: RA, AxSpA, PsA, other inflammatory rheumatic diseases or tissue disorders, or are suspected for one of the above. Patients must be able to give written and oral informed consent and be aged  $\geq 18$  years. There are no exclusion criteria. Patient inclusion and follow-up will be performed by nurses and physicians when the patients meet for scheduled routine clinical visits. The number of potentially eligible patients for the study is shown in Figure 1.

## Clinical data

At the time of inclusion the following clinical data are collected in DANBIO [30,34,37]:

- 1) Patient demographics: e.g. age, gender, body weight, diagnosis, and disease duration
- 2) Exposures: i.e. previous and current treatment with DMARDs including dosing schedule, start and stop date, and reason for treatment withdrawal
- 3) Outcomes: patient reported outcomes (e.g. visual analogue scales (VAS) for pain, fatigue, patient's global, Health Assessment Questionnaire (HAQ), quality of life), Disease Activity Score 28-joints (DAS28), serum CRP concentration, radiographic status (for RA: erosions on X-rays of hand or feet), and bone mineral density (BMD). In axial disease: Bath Ankylosing Spondylitis (BAS)-scores for disease activity (BASDAI), function (BASFI), and metrology index (BASMI) are registered
- 4) Comorbidities and lifestyle factors: serum cholesterol, diabetes, blood pressure, cardiovascular disease or other comorbidities, smoking status, and exercise habits

Upon every new collection of biological material, exposure and outcome data are re-evaluated and registered within 30 days before/after the collection of biological material. Any prescription of medical treatment and the monitoring of disease status (radiographic status, BMD, etc.) are done as part of routine care and do not follow a specific study protocol. Data registration in the DANBIO registry follows DANBIO guidelines [34,37].

## Biological samples

The collected biological material is primarily blood. Synovial fluid, tissue, cartilage, bone and bone marrow may also be collected, when accessible and relevant. Peripheral blood is collected in one EDTA tube (9 ml), two serum tubes (2x9 ml), and one PAXgene blood RNA tube (2.5 ml, Becton & Dickinson, Lyngby, Denmark). Blood samples are processed according to the nationally approved SOP for blood (Figure 2) [31]. In brief, EDTA whole blood (1.5 ml) is isolated followed by the centrifugation of EDTA and serum tubes at 2000xg and 4°C for 10 min. After centrifugation 2x2 ml EDTA plasma, 1x EDTA buffy coat and 4x2 ml serum are isolated. PAXgene Blood RNA tubes are kept at room temperature for 2-72 hours, hereafter frozen at -20°C for 24-72 hours, and finally stored long term at -80°C. Whole blood and buffy coat are stored at ≤ -20°C; plasma and serum are stored at -80°C.

Synovial fluid is collected in EDTA tubes (9 ml) and centrifuged at 2000xg and 4°C for 10 min. The cell-free supernatant is transferred to 5 ml cryotubes and each cell-pellet is resuspended in 1 ml supernatant and pooled in 5 ml cryotubes. Sample processing results in: ≤20x5 ml cell-free synovial fluid and ≤2x5 ml cell-pellet, which are stored long term at -80°C.

Pre-analytical factors such as date and time of sampling, handling and storage, temperature during transportation, and the exact handling procedure are registered in the nationwide Bio- and Genome Bank Denmark registry. All samples are pseudonymised before storage.

## Assay methods

The protocol aims to investigate the following biomarkers in blood, synovial fluid, or tissue:

- 1) Genetic variation using Next Generation Sequencing (NGS) and Whole Genome Sequencing (WGS), and RNA and miRNA expression profiles
- 2) Protein biomarker profiles of inflammation, and bone- and cartilage-metabolism, using, e.g., the Multi Biomarker Disease Activity (MBDA) score (a panel of 12 proteins) [38] (Cresendo Bioscience Inc., South San Francisco, CA, USA), Proseek Multiplex protein arrays (panels of 92 proteins) (Olink Proteomics, Uppsala, Sweden, [www.olink.com](http://www.olink.com)), or proteomics platforms, such as mass spectrometry, protein-arrays, or multiplexed-ELISA

- 3) Metabolites using Nuclear Magnetic Resonance (NMR)-spectroscopy
- 4) ADA against IFX and IFX-drug concentrations using a target-based assay fully automated on the AutoDELFI<sup>®</sup> (PerkinElmer, Waltham, MA, USA) immunoassay platform (Oslo University Hospital, Radiumhospitalet, Oslo, Norway)

All samples will be analysed in pseudonymised form to ensure blinded testing by the laboratory personnel. The list of specific diagnostic, prognostic, and predictive biomarkers will be updated continuously according to new discoveries. The methods for biomarker analysis are rapidly expanding and improving, and the best available method will be used at time of analysis.

### Statistical methods

For the longitudinal samples it is expected that the numbers collected during a 10-year period will provide sufficient statistical power to identify prognostic and predictive biomarkers if these are present among >10% of the patients. Knowledge within the field is still insufficient, thus, it is not possible to perform a comprehensive power calculation; this will, however, be performed before any biomarker analysis is done.

In general, statistical analyses will be done according to available data; the following statistical tests may be used (the list is not complete): comparison of group demographics will be done with Student's t-test, Pearson's chi-square test or Mann-Whitney U-test according to the distribution of data. Due to the large size of the dataset the probability for type II error in testing the hypothesis will be low. Treatment duration and time to event can be explored with Kaplan-Meier curves, log-rank statistics and Cox regression analyses. Treatment outcomes across groups or according to specific biomarkers will be analysed with logistic regression analyses. Multivariable analyses will be performed in order to study the impact of potential confounders. These confounders may be identified in the DANBIO registry (gender, age, smoking status, or other baseline characteristics). All included patients are recruited and treated in routine care across Denmark and this will inevitably lead to some missing data (missing sampling of biological material, missing registration of corresponding clinical data, whenever biological material is collected, patient lost to follow-up, etc.). For sensitivity, various statistical methods may be applied in order to test the robustness of the results. This may be done as last observation carried forward in case of lacking data on clinical outcomes,

1  
2  
3  
4 non-responder imputation, or statistical multiple imputation of missing data. Statistical expertise will be  
5  
6 included when necessary.  
7  
8

## 9 10 **ETHICS AND DISSEMINATION**

11 The protocol is approved by the Danish Ethics Committee (H-2-2014-086, supplementary protocol 49419)  
12 and The Danish Data Protection Agency (RH-2015-297, I-Suite 04318). The Danish Rheumatologic Biobank  
13 is approved by The Danish Data Protection Agency (GLO-2015-6, I-Suite 03490). All patients receive verbal  
14 and written information before enrolment, and give oral and written consent at baseline according to the  
15 guidelines from the Danish Ethics Committee. All patients are informed that they can withdraw from the  
16 study at any time without it having consequences for their treatment. In case of withdrawal, samples are  
17 discarded and all patient-related registrations deleted from the Bio- and Genome Bank Denmark registry.  
18  
19  
20  
21  
22  
23  
24

25 The sampled volume of blood for the study is 26.5 ml per patient-visit and maximum 240 ml/year.  
26 The sampling of blood for the study is performed simultaneously with scheduled routine blood sampling,  
27 thus minimizing the discomfort for the patient. Synovial fluid, surgical tissue, or bone marrow will only be  
28 collected if relevant interventions occur as part of routine care and surplus material, not used for diagnostic  
29 or therapeutic purposes, is available. The patients will be contacted and informed regarding the overall study  
30 results if they indicate interest in this in the patient study consent form. Direct feedback to the patient may be  
31 relevant in case of the discovery of mutations in known disease-linked genes, or as random discoveries, and  
32 will occur according to the guidelines directed by the Danish Ethics Committee (document number 1293688,  
33 October 2013). The physician in charge of the project at the individual department is responsible for  
34 conducting the study in accordance with the Helsinki declaration. Study participation does not affect the  
35 treatment course of individual patients and the patients will be treated according to clinical practise.  
36  
37  
38  
39  
40  
41  
42  
43  
44  
45  
46

47 Due to the large number of included patients, it will be possible to perform exploratory as well as  
48 validation biomarker studies. We plan to evaluate and publish study results according to the REMARK [13],  
49 STROBE [33], and STARD [39] guidelines. Results will be published in international and peer-reviewed  
50 scientific journals and presented at international conferences. Negative, positive as well as inconclusive  
51 results will be published. If relevant, collaborations with international researchers will be established to  
52  
53  
54  
55  
56  
57  
58

1  
2  
3  
4 facilitate the right expertise for biomarker analyses. The first results (measurements of s-IFX and ADA drug  
5 levels up to one year after switch from originator to biosimilar IFX) have been presented [36,40].  
6  
7  
8

## 9 10 **STUDY STATUS**

11 Patient recruitment started in May 2015 and is expected to continue until January 1<sup>st</sup>, 2025, with follow-up  
12 until January 1<sup>st</sup>, 2030. Currently, ≈3,000 patients have been enrolled in the study and >5,000 blood samples  
13 have been collected.  
14  
15  
16

## 17 18 19 **DISCUSSION AND POTENTIAL LIMITATIONS**

20  
21 In this observational, prospective, and translational biomarker study of patients with inflammatory rheumatic  
22 diseases, blood samples are collected in routine care and closely linked to extensive clinical data regarding  
23 rheumatic disease status and activity, medical treatment, treatment efficacy and adverse events, and  
24 comorbidities. The study protocol allows for a large-scale collection of blood and other biological materials  
25 with the aim to identify new biomarkers that can be used for improved personalised treatment of patients  
26 with inflammatory rheumatic diseases. Additionally, the nationwide collection of biological materials and  
27 clinical data is intended to further promote research collaboration within inflammatory rheumatic diseases,  
28 both nationally and internationally, in order to ensure research of the highest quality for the benefit of the  
29 patients.  
30  
31  
32  
33  
34  
35  
36  
37  
38

39 Positivity for IgM-RF and anti-CCP are established risk factors for development of RA, and they are  
40 currently used as part of classification criteria and as prognostic markers [3]. In AxSpA, HLA-B27 is part of  
41 the disease classification [41]. Apart from the erythrocyte sedimentation rate and serum-CRP level, no  
42 biomarkers are used in routine care, and they cannot predict treatment responses or side effects. The wide  
43 range of currently available and future bDMARDs with different modes of action for the treatment of  
44 inflammatory arthritis, and the recent introduction of biosimilars and tsDMARDs, stresses the importance of  
45 improved ability to select the most effective treatment in the individual patient. Development of diagnostic,  
46 prognostic and predictive biomarkers will benefit the treatment of future patients and facilitate personalised  
47 medicine.  
48  
49  
50  
51  
52  
53  
54  
55  
56  
57  
58

1  
2  
3  
4 Patient recruitment and follow-up in routine care will lead to some limitations in clinical and  
5 biological data. Since patients are recruited across several rheumatic diagnoses and treatments, patient  
6 inclusion may take some time in order to obtain enough samples for a specific research question. However,  
7 since it is mandatory to register patients receiving biological treatment in DANBIO, coverage is high ( $\approx 96\%$ )  
8 [42] and the risk of selection bias low. The risks for the patient are minimal and are out-weighted by the  
9 benefits for future patients. The non-randomised study design inherits the risks of confounding, and thorough  
10 statistical analysis and confounder adjustment is therefore important. On the other hand, the wide recruitment  
11 of patients treated in routine care may provide valuable data on, e.g., elderly patients with comorbidities.  
12 This may be a valuable supplement to data generated in randomised trials.  
13  
14  
15  
16  
17  
18  
19  
20

21 Hopefully, the results of the present study will provide us with new biomarkers that will improve our  
22 ability to a) diagnose rheumatic diseases more accurately and at an earlier stage, b) prognosticate the  
23 development of rheumatic diseases, and c) predict and monitor treatment effectiveness in the individual  
24 patient (personalised treatment).  
25  
26  
27  
28

29 Researchers, who are interested in collaboration regarding samples and/or clinical data from DANBIO  
30 should contact the Danish Rheumatologic Biobank [31] and DANBIO [30], respectively.  
31  
32  
33  
34

### 35 **Funding**

36 The Danish Rheumatism Association and Danish Regions funded the establishment of The Danish  
37 Rheumatologic Biobank. Danish Regions are funding the continued collection of biological samples and  
38 clinical data. The funders will have no influence on study design, data analysis, interpretation of results, or  
39 publications. Biomarker analyses will be funded by research grants.  
40  
41  
42  
43  
44  
45  
46

### 47 **Contributors**

48 MLH and JJ wrote the protocol for the Research Ethics Committee. MLH, JJ, EH, TK and BG contributed to  
49 study concept. TK and BG drafted and revised the manuscript after feedback from all authors. All authors  
50 contributed to review of the present manuscript and approved the final version of the manuscript.  
51  
52  
53  
54  
55  
56  
57  
58



## Competing interests

None

## Provenance and peer review

Not commissioned; externally peer review.

## Acknowledgements

The Danish Rheumatologic Biobank is acknowledged for handling and storage of biological material. Lab technician Teresa Rozenfeld and IT specialist Niels Steen Krogh are acknowledged for their assistance. The Biomarker Protocol Study Group, listed below, is acknowledged for their contribution to data registration or sample collection, and for review of the present manuscript: Asta Linauskas, North Denmark Regional Hospital; Gitte Meyer Larsen, North Denmark Regional Hospital; Anne Gitte Loft, Aarhus University Hospital; Charlotte Modin, Aarhus University Hospital; Karin Skovgaard, Aarhus University Hospital; Inge Juul Sørensen, Rigshospitalet; Britt Corfixen, Rigshospitalet; Oliver Hendricks, King Christian 10<sup>th</sup> Hospital for Rheumatic Diseases, Graasten; Charlotte Drachmann, King Christian 10<sup>th</sup> Hospital for Rheumatic Diseases, Graasten; Hanne Lindegaard, Odense University Hospital; Marina Bjørling-Poulsen, Odense University Hospital; Lene Dreyer, Copenhagen University Hospital, Gentofte; Johnny Raun, Hospital Lillebaelt, Kolding; Mikkel Østergaard, Rigshospitalet; Kim Hørslev-Petersen, King Christian 10<sup>th</sup> Hospital for Rheumatic Diseases, Graasten; Henning Bliddal, Frederiksberg Hospital; Claus Rasmussen, North Denmark Regional Hospital; Torkell Ellingsen, Odense University Hospital; Søren Jacobsen, Rigshospitalet; Tove Lorenzen, Silkeborg Regional Hospital; Inger Marie Jensen Hansen, OUH Svendborg Hospital; Annette Schlemmer, Aalborg University Hospital; Salome Kristensen, Aalborg University Hospital; Kristian Stengaard-Pedersen, Aarhus University Hospital; Michael Stoltenberg, Zealand University Hospital, Køge; Henrik Nordin, Zealand University Hospital, Køge; Peter Mosborg, Randers Regional Hospital; Susanne Juhl Pedersen, Rigshospitalet; Christoffer Tandrup Nielsen, Rigshospitalet; Ellen-Margrethe Hauge, Aarhus University Hospital; Bent Deleuran, Aarhus University; Cecilie Brahe, Rigshospitalet; Christian Gytz Ammitzbøll, Aarhus University Hospital; Tue Wenzel Kragstrup, Aarhus University; Karen Carlsen, North



1  
2  
3  
4 Zealand University Hospital, Hillerød; Niklas Rye Jørgensen, Rigshospitalet; Dorte Vendelboe Jensen,  
5  
6 Copenhagen University Hospital, Gentofte; Heidi Lausten Munk, Odense University Hospital; Michael  
7  
8 Kruse Meyer, North Denmark Regional Hospital; and Tine Lottenburger, Hospital Lillebaelt, Vejle.  
9  
10

## 11 REFERENCES

- 13 1 Eriksson JK, Johansson K, Askling J, *et al.* Costs for hospital care, drugs and lost work days in  
14 incident and prevalent rheumatoid arthritis: how large, and how are they distributed? *Ann Rheum Dis*  
15 2015;**74**:648–54. doi:10.1136/annrheumdis-2013-204080  
16  
17  
18
- 19 2 Kiadaliri AA, Felson DT, Neogi T, *et al.* Rheumatoid arthritis as underlying cause of death in 31  
20 countries, 1987-2011: Trend analysis of WHO mortality database. *Arthritis Rheumatol (Hoboken, NJ)*  
21 2017;**69**:1560–5. doi:10.1002/art.40091  
22  
23  
24
- 25 3 Smolen JS, Landewé R, Bijlsma J, *et al.* EULAR recommendations for the management of  
26 rheumatoid arthritis with synthetic and biological disease-modifying antirheumatic drugs: 2016  
27 update. *Ann Rheum Dis* 2017;**76**:960–77. doi:10.1136/annrheumdis-2016-210715  
28  
29  
30
- 31 4 Smolen JS, Breedveld FC, Burmester GR, *et al.* Treating rheumatoid arthritis to target: 2014 update  
32 of the recommendations of an international task force. *Ann Rheum Dis* 2016;**75**:3–15.  
33  
34  
35  
36  
37  
38
- 39 5 Gossec L, Smolen JS, Ramiro S, *et al.* European League Against Rheumatism (EULAR)  
40 recommendations for the management of psoriatic arthritis with pharmacological therapies: 2015  
41 update. *Ann Rheum Dis* 2016;**75**:499–510. doi:10.1136/annrheumdis-2015-208337  
42  
43  
44
- 45 6 Harnett J, Wiederkehr D, Gerber R, *et al.* Real-world evaluation of TNF-inhibitor utilization in  
46 rheumatoid arthritis. *J Med Econ* 2016;**19**:91–102. doi:10.3111/13696998.2015.1099538  
47  
48
- 49 7 Hetland ML, Christensen IJ, Tarp U, *et al.* Direct comparison of treatment responses, remission rates,  
50 and drug adherence in patients with rheumatoid arthritis treated with adalimumab, etanercept, or  
51 infliximab: results from eight years of surveillance of clinical practice in the nationwide Danish  
52 DANBIO registry. *Arthritis Rheum* 2010;**62**:22–32. doi:10.1002/art.27227  
53  
54
- 55 8 Isaacs JD, Ferraccioli G. The need for personalised medicine for rheumatoid arthritis. *Ann Rheum Dis*  
56  
57  
58

- 2011;**70**:4–7. doi:10.1136/ard.2010.135376
- 9 Biomarkers Definitions Working Group. Biomarkers and surrogate endpoints: preferred definitions  
and conceptual framework. *Clin Pharmacol Ther* 2001;**69**:89–95. doi:10.1067/mcp.2001.113989
- 10 Strimbu K, Tavel J a. What are Biomarkers? *Curr Opin HIV AIDS* 2011;**5**:463–6.  
doi:10.1097/COH.0b013e32833ed177.What
- 11 Mohan C, Assassi S. Biomarkers in rheumatic diseases: how can they facilitate diagnosis and  
assessment of disease activity? *BMJ* 2015;**351**:h5079. doi:10.1136/bmj.h5079
- 12 Churov A, Churov A V. MicroRNAs in rheumatoid arthritis: altered expression and diagnostic  
potential. *Autoimmun Rev* 2015;**14**:1029–37.
- 13 Altman DG, McShane LM, Sauerbrei W, *et al*. Reporting Recommendations for Tumor Marker  
Prognostic Studies (REMARK): explanation and elaboration. *PLoS Med* 2012;**9**:e1001216.  
doi:10.1371/journal.pmed.1001216
- 14 Hayes DF. Biomarker validation and testing. *Mol Oncol* 2015;**9**:960–6.  
doi:10.1016/j.molonc.2014.10.004
- 15 Saad MN, Mabrouk MS, Eldeib AM, *et al*. Identification of rheumatoid arthritis biomarkers based on  
single nucleotide polymorphisms and haplotype blocks: A systematic review and meta-analysis. *J  
Adv Res* 2016;**7**:1–16. doi:10.1016/j.jare.2015.01.008
- 16 Chemin K, Klareskog L, Malmström V. Is rheumatoid arthritis an autoimmune disease? *Curr Opin  
Rheumatol* 2016;**28**:181–8. doi:10.1097/BOR.0000000000000253
- 17 Hwang S-H, Jung S-H, Lee S, *et al*. Leukocyte-specific protein 1 regulates T-cell migration in  
rheumatoid arthritis. *Proc Natl Acad Sci* 2015;**112**:E6535–43. doi:10.1073/pnas.1514152112
- 18 Lee YH, Bae S-C, Seo YH, *et al*. Association between FCGR3B copy number variations and  
susceptibility to autoimmune diseases: a meta-analysis. *Inflamm Res* 2015;**64**:983–91.  
doi:10.1007/s00011-015-0882-1
- 19 Murata K, Yoshitomi H, Tanida S, *et al*. Plasma and synovial fluid microRNAs as potential  
biomarkers of rheumatoid arthritis and osteoarthritis. *Arthritis Res Ther* 2010;**12**:R86.  
doi:10.1186/ar3013

- 1  
2  
3  
4 20 Vicente R, Noël D, Pers Y-M, *et al.* Deregulation and therapeutic potential of microRNAs in arthritic  
5 diseases. *Nat Rev Rheumatol* 2016;**12**:496–496. doi:10.1038/nrrheum.2016.119  
6  
7  
8 21 Chen J-Q, Papp G, Szodoray P, *et al.* The role of microRNAs in the pathogenesis of autoimmune  
9 diseases. *Autoimmun Rev* 2016;**15**:1171–80. doi:10.1016/j.autrev.2016.09.003  
10  
11  
12 22 Kruse Meyer M, Andersen M, Bennike TB, *et al.* Effect of IL-6R Inhibition with Tocilizumab on the  
13 Proteome of Peripheral Blood Mononuclear Cells from a Rheumatoid Arthritis Patient. *J Proteomics*  
14 *Bioinform* 2015;**8**. doi:10.4172/jpb.1000380  
15  
16  
17 23 Bennike TB, Ellingsen T, Glerup H, *et al.* Proteome Analysis of Rheumatoid Arthritis Gut Mucosa. *J*  
18 *Proteome Res* 2017;**16**:346–54. doi:10.1021/acs.jproteome.6b00598  
19  
20  
21 24 Ortea I, Roschitzki B, López-Rodríguez R, *et al.* Independent Candidate Serum Protein Biomarkers  
22 of Response to Adalimumab and to Infliximab in Rheumatoid Arthritis: An Exploratory Study. *PLoS*  
23 *One* 2016;**11**:e0153140. doi:10.1371/journal.pone.0153140  
24  
25  
26  
27 25 Ortea I, Roschitzki B, Ovalles JG, *et al.* Discovery of serum proteomic biomarkers for prediction of  
28 response to infliximab (a monoclonal anti-TNF antibody) treatment in rheumatoid arthritis: An  
29 exploratory analysis. *J Proteomics* 2012;**77**:372–82. doi:10.1016/j.jprot.2012.09.011  
30  
31  
32  
33 26 Guma M, Tiziani S, Firestein GS. Metabolomics in rheumatic diseases: desperately seeking  
34 biomarkers. *Nat Rev Rheumatol* 2016;**12**:269–81. doi:10.1038/nrrheum.2016.1  
35  
36  
37 27 Aletaha D, Neogi T, Silman AJ, *et al.* 2010 Rheumatoid arthritis classification criteria: an American  
38 College of Rheumatology/European League Against Rheumatism collaborative initiative. *Arthritis*  
39 *Rheum* 2010;**62**:2569–81. doi:10.1002/art.27584  
40  
41  
42  
43 28 Rudwaleit M, Taylor WJ. Classification criteria for psoriatic arthritis and ankylosing spondylitis/axial  
44 spondyloarthritis. *Best Pract Res Clin Rheumatol* 2010;**24**:589–604. doi:10.1016/j.berh.2010.05.007  
45  
46  
47 29 Sieper J, Rudwaleit M, Baraliakos X, *et al.* The Assessment of SpondyloArthritis international  
48 Society (ASAS) handbook: a guide to assess spondyloarthritis. *Ann Rheum Dis* 2009;**68 Suppl 2**:ii1-  
49 44. doi:10.1136/ard.2008.104018  
50  
51  
52  
53 30 DANBIO - Dansk reumatologisk database. [www.danbio-online.dk](http://www.danbio-online.dk) (accessed 4 Jul 2017).  
54  
55  
56 31 Danish Regions. Bio- and Genome Bank Denmark. <http://www.regioner.dk/rbgben> (accessed 4 Jul  
57  
58  
59

- 2017).
- 32 Kringelbach TM, Glintborg B, Johansen J, *et al.* The nationwide Danish Rheumatologic Biobank – paving the road to personalized treatment of patients with inflammatory rheumatic diseases (Abstract no. EULAR16-2666). *Eur Leag Against Rheum - 17th Annu Eur Congr Rheumatol* 2016.
- 33 Vandembroucke JP, von Elm E, Altman DG, *et al.* Strengthening the Reporting of Observational Studies in Epidemiology (STROBE): Explanation and elaboration. *Int J Surg* 2014;**12**:1500–24. doi:10.1016/j.ijisu.2014.07.014
- 34 Ibfelt EH, Jensen DV, Hetland ML. The Danish nationwide clinical register for patients with rheumatoid arthritis: DANBIO. *Clin Epidemiol* 2016;**8**:737–42. doi:10.2147/CLEP.S99490
- 35 Glintborg B, Sørensen IJ, Loft AG, *et al.* A nationwide non-medical switch from originator infliximab to biosimilar CT-P13 in 802 patients with inflammatory arthritis: 1-year clinical outcomes from the DANBIO registry. *Ann Rheum Dis* 2017;**76**:1426–31. doi:10.1136/annrheumdis-2016-210742
- 36 Glintborg B, Kringelbach T, Bolstad N, *et al.* Drug concentrations and anti-drug antibodies during treatment with biosimilar infliximab (CT-P13) in routine care. *Submitted 2017.*
- 37 Hetland ML, Jensen D V, Krogh NS. Monitoring patients with rheumatoid arthritis in routine care: experiences from a treat-to-target strategy using the DANBIO registry. *Clin Exp Rheumatol* 2014;**32**:S-141-146.
- 38 Li W, Sasso EH, van der Helm-van Mil AHM, *et al.* Relationship of multi-biomarker disease activity score and other risk factors with radiographic progression in an observational study of patients with rheumatoid arthritis. *Rheumatology* 2016;**55**:357–66. doi:10.1093/rheumatology/kev341
- 39 Meyer GJ. Guidelines for reporting information in studies of diagnostic test accuracy: the STARD initiative. *J Pers Assess* 2003;**81**:191–3. doi:10.1207/S15327752JPA8103\_01
- 40 Glintborg B, Kringelbach TM, Høgdall EVS, *et al.* Non-Medical Switch from Originator to Biosimilar Infliximab in Patients with Inflammatory Arthritis – Impact on s-Infliximab and Antidrug-Antibodies. Results from the Danish Rheumatologic Biobank and the Danbio Registry [abstract no.: 1997]. *Arthritis Rheumatol.* 2016;**68**.

1  
2  
3  
4  
5  
6  
7  
8  
9  
10  
11  
12  
13  
14  
15  
16  
17  
18  
19  
20  
21  
22  
23  
24  
25  
26  
27  
28  
29  
30  
31  
32  
33  
34  
35  
36  
37  
38  
39  
40  
41  
42  
43  
44  
45  
46  
47  
48  
49  
50  
51  
52  
53  
54  
55  
56  
57  
58  
59  
60

41 Haroon M, Winchester R, Giles JT, *et al*. Clinical and genetic associations of radiographic sacroiliitis  
and its different patterns in psoriatic arthritis. *Clin Exp Rheumatol* 2017;**35**:270–6.

42 DANBIO. National Årsrapport 2015. 2016.

For peer review only

## A) Cross-sectional samples

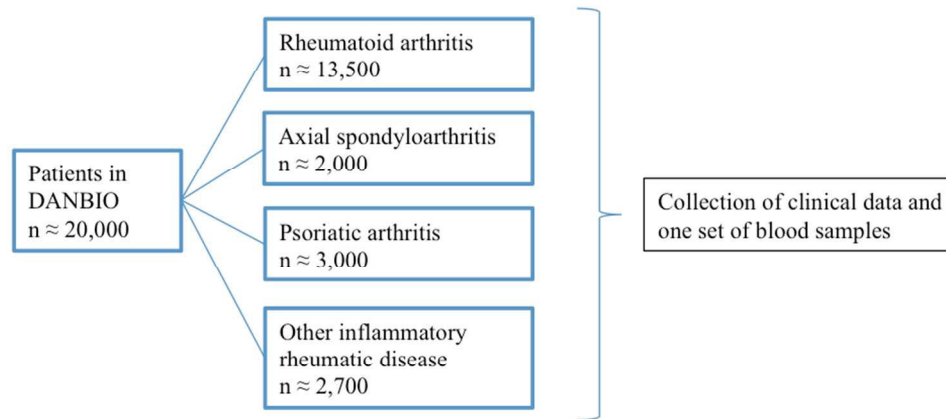

Figure 1 Schematic presentation of study design and sampling strategies. Any patient diagnosed with RA, AxSpA, PsA, other inflammatory rheumatic disease or tissue disorder, or suspected for one of these, may participate when they meet for a scheduled routine clinical visit. These patients can provide one cross-sectional blood sample (A), or may be included for longitudinal follow-up (B) when they start treatment with a new DMARD (see text). Numbers (n) indicate patients potentially eligible for inclusion in one or more of the study arms.

349x204mm (72 x 72 DPI)

## B) Longitudinal samples

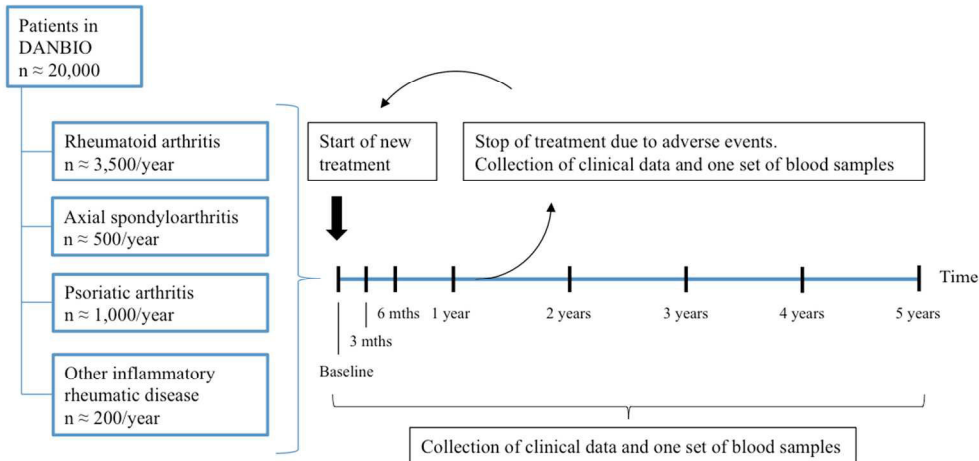

Figure 1 Schematic presentation of study design and sampling strategies. Any patient diagnosed with RA, AxSpA, PsA, other inflammatory rheumatic disease or tissue disorder, or suspected for one of these, may participate when they meet for a scheduled routine clinical visit. These patients can provide one cross-sectional blood sample (A), or may be included for longitudinal follow-up (B) when they start treatment with a new DMARD (see text). Numbers (n) indicate patients potentially eligible for inclusion in one or more of the study arms.

436x257mm (72 x 72 DPI)

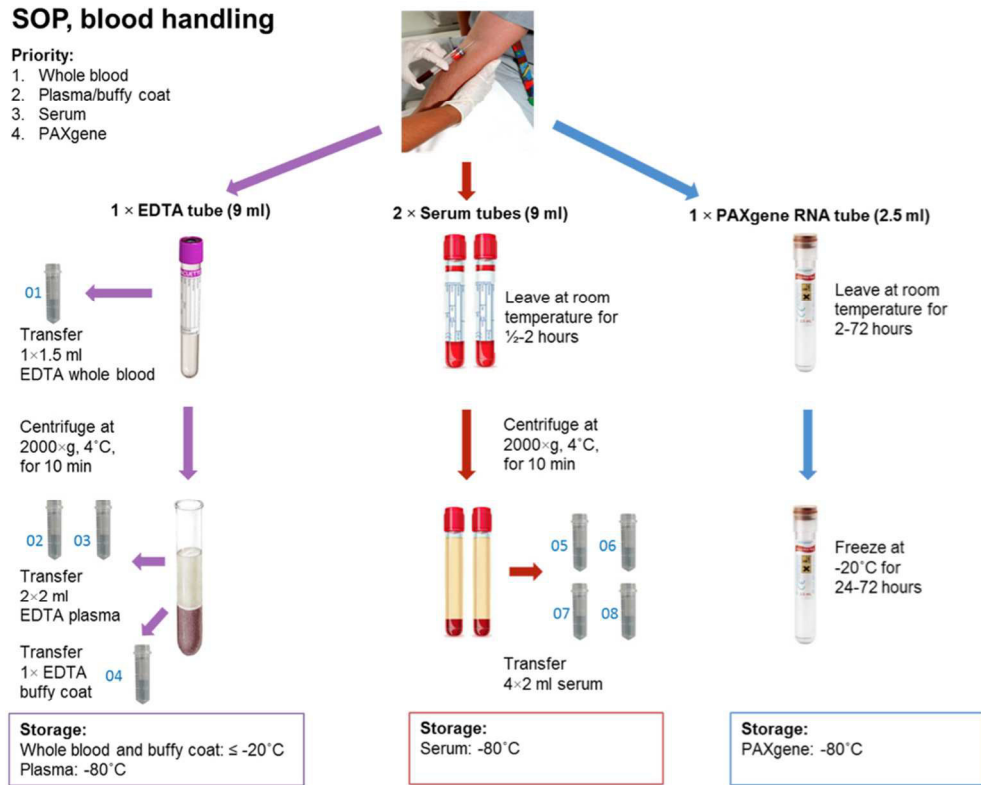

Figure 2 Standard Operating Procedure (SOP) for blood handling in the Danish Rheumatologic Biobank [31]. Peripheral blood is collected in one EDTA tube, two serum tubes, and one PAXgene blood RNA tube. Serum tubes coagulate at room temperature for 30 min to 2 hours. From the EDTA tube, 1.5 ml whole blood is isolated. EDTA and serum tubes are centrifuged at 2000xg and 4°C for 10 min. EDTA plasma (2x2ml), EDTA buffy coat and serum (4x2ml) are isolated. Processed blood samples are stored at ≤-20°C. PAXgene RNA tubes are kept at room temperature for 2-72 hours, then frozen at -20°C for 24-72 hours and stored at -80°C.

355x283mm (72 x 72 DPI)

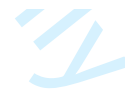



**STROBE 2007 (v4) Statement—Checklist of items that should be included in reports of cohort studies**

| Section/Topic             | Item # | Recommendation                                                                                                                                                                       | Reported on page #                                |
|---------------------------|--------|--------------------------------------------------------------------------------------------------------------------------------------------------------------------------------------|---------------------------------------------------|
| Title and abstract        | 1      | (a) Indicate the study’s design with a commonly used term in the title or the abstract                                                                                               | 1 and 2                                           |
|                           |        | (b) Provide in the abstract an informative and balanced summary of what was done and what was found                                                                                  | 2                                                 |
| <b>Introduction</b>       |        |                                                                                                                                                                                      |                                                   |
| Background/rationale      | 2      | Explain the scientific background and rationale for the investigation being reported                                                                                                 | 4-5                                               |
| Objectives                | 3      | State specific objectives, including any prespecified hypotheses                                                                                                                     | 5                                                 |
| <b>Methods</b>            |        |                                                                                                                                                                                      |                                                   |
| Study design              | 4      | Present key elements of study design early in the paper                                                                                                                              | 6-7                                               |
| Setting                   | 5      | Describe the setting, locations, and relevant dates, including periods of recruitment, exposure, follow-up, and data collection                                                      | 6-9                                               |
| Participants              | 6      | (a) Give the eligibility criteria, and the sources and methods of selection of participants. Describe methods of follow-up                                                           | 8                                                 |
|                           |        | (b) For matched studies, give matching criteria and number of exposed and unexposed                                                                                                  | Not relevant                                      |
| Variables                 | 7      | Clearly define all outcomes, exposures, predictors, potential confounders, and effect modifiers. Give diagnostic criteria, if applicable                                             | 7-8 and 10                                        |
| Data sources/ measurement | 8*     | For each variable of interest, give sources of data and details of methods of assessment (measurement). Describe comparability of assessment methods if there is more than one group | 9-10                                              |
| Bias                      | 9      | Describe any efforts to address potential sources of bias                                                                                                                            | 10                                                |
| Study size                | 10     | Explain how the study size was arrived at                                                                                                                                            | 8 + 10 and Fig 1                                  |
| Quantitative variables    | 11     | Explain how quantitative variables were handled in the analyses. If applicable, describe which groupings were chosen and why                                                         | (not relevant yet, the study is still recruiting) |
| Statistical methods       | 12     | (a) Describe all statistical methods, including those used to control for confounding                                                                                                | 10                                                |
|                           |        | (b) Describe any methods used to examine subgroups and interactions                                                                                                                  | 10                                                |
|                           |        | (c) Explain how missing data were addressed                                                                                                                                          | 10-11                                             |
|                           |        | (d) If applicable, explain how loss to follow-up was addressed                                                                                                                       | 10-11                                             |
|                           |        | (e) Describe any sensitivity analyses                                                                                                                                                | 10-11                                             |

| <b>Results</b>   |     |                                                                                                                                                                                                              |                                                   |
|------------------|-----|--------------------------------------------------------------------------------------------------------------------------------------------------------------------------------------------------------------|---------------------------------------------------|
| Participants     | 13* | (a) Report numbers of individuals at each stage of study—eg numbers potentially eligible, examined for eligibility, confirmed eligible, included in the study, completing follow-up, and analysed            | (not relevant yet, the study is still recruiting) |
|                  |     | (b) Give reasons for non-participation at each stage                                                                                                                                                         | (not relevant yet, the study is still recruiting) |
|                  |     | (c) Consider use of a flow diagram                                                                                                                                                                           | (not relevant yet, the study is still recruiting) |
| Descriptive data | 14* | (a) Give characteristics of study participants (eg demographic, clinical, social) and information on exposures and potential confounders                                                                     | (not relevant yet, the study is still recruiting) |
|                  |     | (b) Indicate number of participants with missing data for each variable of interest                                                                                                                          | (not relevant yet, the study is still recruiting) |
|                  |     | (c) Summarise follow-up time (eg, average and total amount)                                                                                                                                                  | (not relevant yet, the study is still recruiting) |
| Outcome data     | 15* | Report numbers of outcome events or summary measures over time                                                                                                                                               | (not relevant yet, the study is still recruiting) |
| Main results     | 16  | (a) Give unadjusted estimates and, if applicable, confounder-adjusted estimates and their precision (eg, 95% confidence interval). Make clear which confounders were adjusted for and why they were included | (not relevant yet, the study is still recruiting) |
|                  |     | (b) Report category boundaries when continuous variables were categorized                                                                                                                                    | (not relevant yet, the study is still recruiting) |
|                  |     | (c) If relevant, consider translating estimates of relative risk into absolute risk for a meaningful time period                                                                                             | (not relevant yet, the study is still recruiting) |

|                          |    |                                                                                                                                                                            |                                                   |
|--------------------------|----|----------------------------------------------------------------------------------------------------------------------------------------------------------------------------|---------------------------------------------------|
| Other analyses           | 17 | Report other analyses done—eg analyses of subgroups and interactions, and sensitivity analyses                                                                             | (not relevant yet, the study is still recruiting) |
| <b>Discussion</b>        |    |                                                                                                                                                                            |                                                   |
| Key results              | 18 | Summarise key results with reference to study objectives                                                                                                                   | (not relevant yet, the study is still recruiting) |
| <b>Limitations</b>       |    |                                                                                                                                                                            |                                                   |
| Interpretation           | 20 | Give a cautious overall interpretation of results considering objectives, limitations, multiplicity of analyses, results from similar studies, and other relevant evidence | (not relevant yet, the study is still recruiting) |
| Generalisability         | 21 | Discuss the generalisability (external validity) of the study results                                                                                                      | (not relevant yet, the study is still recruiting) |
| <b>Other information</b> |    |                                                                                                                                                                            |                                                   |
| Funding                  | 22 | Give the source of funding and the role of the funders for the present study and, if applicable, for the original study on which the present article is based              | 13                                                |

\*Give information separately for cases and controls in case-control studies and, if applicable, for exposed and unexposed groups in cohort and cross-sectional studies.

**Note:** An Explanation and Elaboration article discusses each checklist item and gives methodological background and published examples of transparent reporting. The STROBE checklist is best used in conjunction with this article (freely available on the Web sites of PLoS Medicine at <http://www.plosmedicine.org/>, Annals of Internal Medicine at <http://www.annals.org/>, and Epidemiology at <http://www.epidem.com/>). Information on the STROBE Initiative is available at [www.strobe-statement.org](http://www.strobe-statement.org).

# BMJ Open

## Identification of new biomarkers to promote personalized treatment of patients with inflammatory rheumatic disease: protocol for an open cohort study.

|                                 |                                                                                                                                                                                                                                                                                                                                                                                                                                                                                                                                                                                                                                                                                                                                                                                                                                                                                                                                                                                                                                                                                                                                                                                                              |
|---------------------------------|--------------------------------------------------------------------------------------------------------------------------------------------------------------------------------------------------------------------------------------------------------------------------------------------------------------------------------------------------------------------------------------------------------------------------------------------------------------------------------------------------------------------------------------------------------------------------------------------------------------------------------------------------------------------------------------------------------------------------------------------------------------------------------------------------------------------------------------------------------------------------------------------------------------------------------------------------------------------------------------------------------------------------------------------------------------------------------------------------------------------------------------------------------------------------------------------------------------|
| Journal:                        | <i>BMJ Open</i>                                                                                                                                                                                                                                                                                                                                                                                                                                                                                                                                                                                                                                                                                                                                                                                                                                                                                                                                                                                                                                                                                                                                                                                              |
| Manuscript ID                   | bmjopen-2017-019325.R1                                                                                                                                                                                                                                                                                                                                                                                                                                                                                                                                                                                                                                                                                                                                                                                                                                                                                                                                                                                                                                                                                                                                                                                       |
| Article Type:                   | Protocol                                                                                                                                                                                                                                                                                                                                                                                                                                                                                                                                                                                                                                                                                                                                                                                                                                                                                                                                                                                                                                                                                                                                                                                                     |
| Date Submitted by the Author:   | 13-Nov-2017                                                                                                                                                                                                                                                                                                                                                                                                                                                                                                                                                                                                                                                                                                                                                                                                                                                                                                                                                                                                                                                                                                                                                                                                  |
| Complete List of Authors:       | Kringelbach, Tina; Copenhagen University Hospital Herlev, Bio- and Genome Bank Denmark and the Danish Rheumatologic Biobank, The Molecular Unit, Department of Pathology<br>Glintborg, B.; Rigshospitalet Glostrup, Copenhagen Centre for Arthritis Research, Center for Rheumatology and Spine Diseases, the Danish DANBIO Registry, and the Danish Rheumatologic Biobank<br>Hogdall, Estrid; Copenhagen University Hospital Herlev, Bio- and Genome Bank Denmark and the Danish Rheumatologic Biobank, The Molecular Unit, Department of Pathology; University of Copenhagen, Department of Clinical Medicine, Faculty of Health and Medical Sciences<br>Johansen, Julia; Copenhagen University Hospital Herlev, Departments of Medicine and Oncology, and the Danish Rheumatologic Biobank; University of Copenhagen, Department of Clinical Medicine, Faculty of Health and Medical Sciences<br>Lund Hetland, Merete; Rigshospitalet Glostrup, Copenhagen Centre for Arthritis Research, Center for Rheumatology and Spine Diseases, the Danish DANBIO Registry, and the Danish Rheumatologic Biobank; University of Copenhagen, Department of Clinical Medicine, Faculty of Health and Medical Sciences |
| <b>Primary Subject Heading</b>: | Rheumatology                                                                                                                                                                                                                                                                                                                                                                                                                                                                                                                                                                                                                                                                                                                                                                                                                                                                                                                                                                                                                                                                                                                                                                                                 |
| Secondary Subject Heading:      | Epidemiology                                                                                                                                                                                                                                                                                                                                                                                                                                                                                                                                                                                                                                                                                                                                                                                                                                                                                                                                                                                                                                                                                                                                                                                                 |
| Keywords:                       | Inflammatory rheumatic disease, Personalised treatment, Biomarkers, Danish Rheumatologic Biobank, RHEUMATOLOGY                                                                                                                                                                                                                                                                                                                                                                                                                                                                                                                                                                                                                                                                                                                                                                                                                                                                                                                                                                                                                                                                                               |
|                                 |                                                                                                                                                                                                                                                                                                                                                                                                                                                                                                                                                                                                                                                                                                                                                                                                                                                                                                                                                                                                                                                                                                                                                                                                              |

SCHOLARONE™  
Manuscripts

1  
2  
3  
4 **Identification of new biomarkers to promote personalized treatment of patients with inflammatory**  
5 **rheumatic disease: protocol for an open cohort study.**  
6  
7

8 **Running title:** A Rheumatologic Biomarker Protocol  
9

10  
11 T M Kringelbach<sup>1,2, #</sup>, B Glintborg<sup>1,3,4, #</sup>, E V Hogdall<sup>1,2,5</sup>, J Johansen<sup>1,5,6</sup>, M L Hetland<sup>1,3,4,5</sup>, and The  
12 Biomarker Protocol Study Group<sup>7</sup>  
13  
14

15  
16 <sup>#</sup>T M Kringelbach and B Glintborg contributed equally to this paper and share first co-authorship  
17

18  
19 <sup>1</sup>The Danish Rheumatologic Biobank

20 <sup>2</sup>Bio- and Genome Bank Denmark, The Molecular Unit, Department of Pathology, Copenhagen University  
21 Hospital Herlev, Herlev, Denmark  
22

23 <sup>3</sup>Copenhagen Centre for Arthritis Research, Center for Rheumatology and Spine Diseases, Rigshospitalet,  
24 Glostrup, Denmark  
25

26 <sup>4</sup>The Danish DANBIO registry, Rigshospitalet, Glostrup, Denmark

27 <sup>5</sup>Department of Clinical Medicine, Faculty of Health and Medical Sciences, University of Copenhagen,  
28 Copenhagen, Denmark  
29

30 <sup>6</sup>Departments of Medicine and Oncology, Copenhagen University Hospital Herlev, Herlev, Denmark

31 <sup>7</sup>The Biomarker Protocol Study Group is defined under acknowledgements  
32  
33

34  
35 ClinicalTrials.gov ID: NCT03214263  
36  
37

38 **Corresponding author:** Merete L. Hetland, Department of Rheumatology, Rigshospitalet Glostrup,  
39 Glostrup, Denmark, phone: 0045-38633330, e-mail: merete.hetland@dadlnet.dk  
40  
41

42  
43 **Author disclosures:**

44 B Glintborg: Biogen, AbbVie

45 M L Hetland: Orion, BMS, AbbVie, Biogen, Pfizer, MSD, Roche, Celltrion, Crescendo, UCB

46 The remaining authors: none declared  
47  
48  
49

50 **Word count:**

51 **Abstract:** 293 words

52 **Text:** 3,708 words  
53  
54  
55  
56  
57  
58

## ABSTRACT

**Introduction:** The introduction of biological disease modifying anti-rheumatic drugs (bDMARDs) has improved the treatment of inflammatory rheumatic diseases dramatically. However, bDMARD treatment failure occurs in 30-40% of patients due to lack of effect or adverse events, and the tools to predict treatment outcomes in individual patients are currently limited. The objective of the present study is to identify diagnostic, prognostic and predictive biomarkers, which can be used to 1) diagnose inflammatory rheumatic diseases early in the disease course with high sensitivity and specificity, 2) improve prognostication, or 3) predict and monitor treatment effectiveness and tolerability for the individual patient.

**Methods and analysis:** The present study is an observational and translational open cohort study with prospective collection of clinical data and biological materials (primarily blood) in patients with inflammatory rheumatic diseases treated in routine care. Patients contribute with one cross-sectional blood sample and/or are enrolled for longitudinal follow-up upon initiation of a new DMARD (blood sampling after 0, 3, 6, 12, 24, 36, 48, 60 months of treatment). Other biological materials will be collected when accessible and relevant. Demographics, disease characteristics, comorbidities, and lifestyle factors are registered at inclusion; DMARD treatment and outcomes are collected repeatedly during follow-up. Currently (July 2017), >5,000 samples from ≈3,000 patients have been collected. Data will be analysed using appropriate statistical analyses.

**Ethics and dissemination:** The protocol is approved by the Danish Ethics Committee and The Danish Data Protection Agency. Participants give written and oral informed consent. Biomarkers will be evaluated and published according to the REporting recommendations for tumour MARKer prognostic studies (REMARK), STrengthening the Reporting of OBservational studies in Epidemiology (STROBE), and the Standards for Reporting of Diagnostic Accuracy (STARD) guidelines. Results will be published in peer-reviewed scientific journals and presented at international conferences.

ClinicalTrials.gov ID: NCT03214263

#### Strengths and limitations of this study

- Nation-wide collection of biological materials and corresponding extensive clinical data provides the opportunity to discover and/or validate a wide range of diagnostic, prognostic, and predictive biomarkers in patients with inflammatory rheumatic disease
- Recruitment of patients treated in routine care is expected to provide valuable data on “real life patients” (e.g. elderly patients with comorbidities), which are different from the more homogeneous patient population in randomised controlled trials
- Standardised collection of samples and quality control ensures comparability between samples from different departments, and enables research in less common rheumatic diseases
- Patient recruitment and follow-up in routine care and across several rheumatic diagnoses and treatments will be associated with some limitations in clinical and biological data
- The non-randomised study design inherits a risk of confounding and thorough statistical analysis and confounder adjustment is therefore important

## INTRODUCTION

Rheumatoid arthritis (RA), psoriatic arthritis (PsA), and axial spondyloarthritis (AxSpA) are examples of chronic inflammatory rheumatic diseases characterised by pain, disability, and progressive decrease in workability, and are associated with comorbidity and risk of early death [1,2]. The impact of these chronic diseases on the patients should be minimized through early diagnosis followed by targeted therapy with minimal side effects. If and when remission is achieved, the patient has the potential to maintain a life with few restrictions – a desirable outcome both for the patient and for society.

The medical treatment of inflammatory rheumatic diseases has improved dramatically during the last decades. This is mainly due to an increased acknowledgement of the treat-to-target concept with conventional synthetic disease modifying anti-rheumatic drugs (csDMARDs) in RA, which implies strict monitoring and aggressive treatment strategies with add-on or switching of therapy according to clinical response or side effects [3–5]. Furthermore, the biological DMARDs (bDMARDs), e.g. tumour necrosis factor alpha inhibitors, or other specific modulators of inflammatory signal transduction, have improved outcomes for patients otherwise refractory to treatment with csDMARDs [4]. New treatment modalities including targeted synthetic DMARDs (tsDMARDs, e.g. Janus Kinase (JAK) inhibitors) are being introduced, and the first biosimilar bDMARDs have been marketed. Biological DMARDs and JAK inhibitors are expensive, and treatment failure, defined as lack of effect or serious adverse events, occurs in 30-40% of patients treated with bDMARDs [6,7]. Tools to predict treatment outcomes and side effects in the individual patient are currently limited [8].

In 1998, the National Institutes of Health Biomarkers Definitions Working Group defined a biomarker as “a characteristic that is objectively measured and evaluated as an indicator of normal biological processes, pathogenic processes, or pharmacologic responses to a therapeutic intervention” [9,10]. Biomarkers are divided in three categories: 1) diagnostic biomarkers, which may be used for early diagnosis of a given disease [11,12]. The ideal diagnostic biomarker should establish the correct diagnosis with high sensitivity and specificity; 2) prognostic biomarkers, which correlate with specific clinical outcomes, and thus progression of disease, regardless of any treatment; and 3) predictive biomarkers, which may be used to predict whether a given patient may benefit from a given treatment [13,14]. Hence, biomarkers may be



1  
2  
3  
4 promising tools to personalise the treatment of patients with inflammatory rheumatic disease. Biomarkers in  
5 blood and tissue include a wide range of molecules with different characteristics such as DNA, RNA,  
6 microRNA (miRNA), proteins, and metabolites. Genetic variation can be caused by single nucleotide  
7 polymorphisms (SNPs), nucleotide insertions/deletions, and Copy Number Variations (CNVs), among which  
8 the SNP and insertions/deletions are the most common types of genetic variation [15–19]. MicroRNAs are  
9 small single-stranded, endogenous, non-coding RNAs (18-25 nucleotides) and play essential roles in  
10 regulating gene expression, cell development, differentiation, and proliferation [19–21]. The human  
11 proteome constitute all expressed human proteins and reflects the biological activity of the patient, and  
12 proteomics is increasingly used to investigate treatment response [22,23] or to stratify responding versus  
13 non-responding patients [24,25]. The metabolome is defined as the complete set of metabolites <1500  
14 daltons found in a given biological sample. It is a dynamic entity, which reflects the interaction between the  
15 individual genetic background and factors such as pathophysiological conditions, diet, and pharmacologic  
16 treatment [26]. In patients with RA, PsA, and AxSpA these biomarkers may be related to the disease itself,  
17 the associated inflammation or treatment-related pharmacokinetics. Biomarkers can be detected in peripheral  
18 blood, synovial fluid, circulating cells or cell-free DNA in plasma, or in tissue (e.g. cartilage, bone, and  
19 synovial membrane).

20  
21  
22  
23  
24  
25  
26  
27  
28  
29  
30  
31  
32  
33  
34  
35  
36  
37  
38  
39  
40  
41  
42  
43  
44  
45  
46  
47  
48  
49  
50  
51  
52  
53  
54  
55  
56  
57  
58  
59  
60  
Currently, some biomarkers are used as part of the classification of arthritis patients, e.g., IgM  
rheumatoid factor (IgM-RF), anti-citrullinated protein antibodies (anti-CCP), C-reactive protein (CRP) and  
human leukocyte antigen B27 (HLA-B27) [27–29]. However, for individual patients, these few biomarkers  
cannot differentiate a patient from a healthy subject with high specificity or predict mild versus severe  
disease. Radiographic imaging is used routinely to assess cumulated joint damage, however, biomarkers  
have the potential of being a more feasible, specific, and reproducible tool for both diagnostic and prognostic  
purposes and for the monitoring of treatment and disease progression.

The present protocol is an observational, prospective, translational research study of rheumatologic  
patients followed in the nationwide Danish DANBIO registry [30] and the Danish Rheumatologic Biobank  
[31,32]. The objective is to identify new diagnostic, prognostic and predictive biomarkers, which can be used  
to 1) diagnose inflammatory rheumatic diseases early in the disease course with high sensitivity and

1  
2  
3  
4 specificity, 2) predict patient prognosis regardless of treatment, or 3) predict and monitor the effective  
5 treatment for the individual patient with minimised risk of side effects. This protocol has been prepared and  
6 presented according to the REporting recommendations for tumour MARKer prognostic studies (REMARK)  
7 and STrengthening the Reporting of OBServational studies in Epidemiology (STROBE) guidelines [13,33].  
8  
9  
10  
11  
12

## 13 **MATERIALS AND METHODS**

### 14 **Study design and setting**

15  
16 Biological samples and clinical data are collected prospectively in rheumatic patients treated in routine care.  
17  
18 Clinical data and outcomes are registered in the Danish nationwide quality registry DANBIO [30,34] and  
19 biological samples are collected via the Danish Rheumatologic Biobank [31,32]. Patient inclusion started in  
20 May 2015 and will continue until 2025 with follow-up until 2030. If needed, the inclusion period can be  
21 expanded.  
22  
23  
24  
25  
26

27 DANBIO is a nationwide, Danish register which serves as a clinical database for monitoring of  
28 clinical quality of treatment and which may be used for research purposes. DANBIO was established in year  
29 2000 and data collection occurs prospectively by a web-based system used in routine care at Danish hospital  
30 Departments of Rheumatology and in primary care (private practising specialists of rheumatology). It is  
31 mandatory to monitor patients with inflammatory rheumatic diseases treated with bDMARDs and patients  
32 with newly diagnosed RA irrespective of treatment [34]. Data registered in DANBIO are listed in the  
33 “Clinical data” section below. DANBIO represents an excellent tool for monitoring patients in routine care  
34 and for research purposes.  
35  
36  
37  
38  
39  
40  
41  
42

43 The Danish Rheumatologic Biobank was established in 2015 through nationwide collaboration  
44 between Departments of Rheumatology and Departments of Clinical Biochemistry in Denmark. The Danish  
45 Rheumatologic Biobank is organised according to the infrastructure of the well-established Danish  
46 CancerBiobank [31], and both biobanks are part of the Bio- and Genome Bank Denmark funded by Danish  
47 Regions (the governmental organisation who runs the public hospitals in Denmark). The foundation of the  
48 Danish Rheumatologic Biobank was funded by the Danish Rheumatism Association and Danish Regions. By  
49 June 1<sup>st</sup>, 2017, 12 hospitals from all parts of Denmark (Rigshospitalet; North Denmark Regional Hospital;  
50  
51  
52  
53  
54  
55  
56  
57  
58

1  
2  
3  
4 King Christian 10<sup>th</sup> Hospital for Rheumatic Diseases, Graasten; Aarhus University Hospital; Copenhagen  
5 University Hospital, Gentofte; Zealand University Hospital, Køge; OUH Svendborg Hospital; Odense  
6 University Hospital; Aalborg University Hospital; Hospital Lillebaelt, Vejle; Randers Regional Hospital; and  
7 University Hospital Bispebjerg and Frederiksberg) participated in the Danish Rheumatologic Biobank, and  
8 additional hospitals are continuously joining. Different types of biological material (e.g. blood, tissue,  
9 synovial fluid, and urine) are collected, handled and stored according to nationally approved Standard  
10 Operating Procedures (SOPs) [31] (see section “Biological Samples”).  
11  
12  
13  
14  
15  
16

17 Patients contribute primarily with blood samples, but also other types of biological materials (synovial  
18 fluid and surgical tissue), when these are accessible and relevant. Patients contribute with one or more of the  
19 following samples: 1) cross-sectional blood samples: patients provide one cross-sectional sample when they  
20 meet for a scheduled routine clinical visit (Figure 1A); 2) longitudinal blood samples: patients may be  
21 enrolled for longitudinal follow-up when they start treatment with a new DMARD. Switching from  
22 csDMARD to bDMARD, or from one bDMARD to another bDMARD, indicates a new baseline sample  
23 (Figure 1B); and 3) other biological materials: Patients may contribute with representative samples of  
24 biologic material if they are scheduled for joint puncture with aspiration (synovial fluid), surgery, or biopsies  
25 (synovia, cartilage, bone, bone-marrow or other tissues). Cross-sectional sampling may be done at any given  
26 disease stage and at any time point during treatment. Longitudinal blood samples are collected at baseline  
27 and after 3, 6, 12, 24, 36, 48 and 60 months of treatment. In case of serious adverse events or treatment  
28 withdrawal, additional blood sampling is performed (Figure 1B). Approximately half of the material will be  
29 used for the present study. The other half can be made available to other researchers, who wish to cooperate,  
30 according to guidelines in the Bio- and Genome Bank Denmark.  
31  
32  
33  
34  
35  
36  
37  
38  
39  
40  
41  
42  
43  
44

45 The present protocol is designed to investigate a broad range of biomarkers in patients with  
46 inflammatory rheumatic diseases. One of the first longitudinal cohorts in the study included patients who  
47 switched from originator Infliximab (IFX, Remicade) to biosimilar IFX (CT-P13, Remsima). According to  
48 national guidelines issued in 2015, all Danish patients diagnosed with inflammatory rheumatic diseases (RA,  
49 PsA, or AxSpA), and treated with originator IFX, were switched to CT-P13 [35]. In association with this  
50 non-medical switch, the aim was to investigate the following biomarkers and clinical outcome: 1) effects of  
51  
52  
53  
54  
55  
56  
57  
58  
59

1  
2  
3  
4 the switch on serum IFX (sIFX) and presence of anti-drug antibodies (ADAb), and 2) association between  
5 sIFX and ADAb at the time of switch on adherence to CT-P13 treatment [36]. Clinical data and longitudinal  
6  
7 blood samples were collected as described in the present protocol.  
8  
9  
10

## 11 **Participants**

12  
13 The Biomarker Protocol is an open cohort study, i.e., participants may enter and leave the population at  
14 different time points during monitoring. Patients are eligible for inclusion if they are followed in routine care  
15 and monitored in DANBIO with one of the following diagnoses: RA, AxSpA, PsA, other inflammatory  
16 rheumatic diseases or tissue disorders, or are suspected for one of the above. Patients must be able to give  
17 written and oral informed consent and be aged  $\geq 18$  years. There are no exclusion criteria. Patient inclusion  
18 and follow-up will be performed by nurses and physicians when the patients meet for scheduled routine  
19 clinical visits. The number of potentially eligible patients for the study is shown in Figure 1.  
20  
21  
22  
23  
24  
25  
26  
27  
28  
29

## 30 **Clinical data**

31 At the time of inclusion the following clinical data are collected in DANBIO [30,34,37]:  
32

- 33 1) Patient demographics: e.g. age, gender, body weight, diagnosis, and disease duration
- 34 2) Exposures: i.e. previous and current treatment with corticosteroids, non-steroid anti-inflammatory  
35 drugs (NSAIDs) and DMARDs including dosing schedule, start and stop date, and reason for  
36 treatment withdrawal
- 37 3) Outcomes: patient reported outcomes (e.g. visual analogue scales (VAS) for pain, fatigue, patient's  
38 global, Health Assessment Questionnaire (HAQ), quality of life), Disease Activity Score 28-joints  
39 (DAS28), serum CRP concentration, radiographic status (for RA: erosions on X-rays of hand or  
40 feet), and bone mineral density (BMD). In axial disease: Bath Ankylosing Spondylitis (BAS)-scores  
41 for disease activity (BASDAI), function (BASFI), and metrology index (BASMI) are registered
- 42 4) Comorbidities and lifestyle factors: serum cholesterol, diabetes, blood pressure, cardiovascular  
43 disease or other comorbidities, smoking status, and exercise habits  
44  
45  
46  
47  
48  
49  
50  
51  
52  
53  
54  
55  
56  
57  
58  
59

1  
2  
3  
4 Upon every new collection of biological material, exposure and outcome data are re-evaluated and  
5 registered within 30 days before/after the collection of biological material. Any prescription of medical  
6 treatment and the monitoring of disease status (radiographic status, BMD, etc.) are done as part of routine  
7 care and do not follow a specific study protocol. Data registration in the DANBIO registry follows DANBIO  
8 guidelines [34,37].  
9  
10  
11  
12

### 13 14 15 **Biological samples**

16 The collected biological material is primarily blood. Synovial fluid, tissue, cartilage, bone and bone marrow  
17 may also be collected, when accessible and relevant. Peripheral blood is collected in one EDTA tube (9 ml),  
18 two serum tubes (2x9 ml), and one PAXgene blood RNA tube (2.5 ml, Becton & Dickinson, Lyngby,  
19 Denmark). Blood samples are processed according to the nationally approved SOP for blood (Figure 2) [31].  
20 In brief, EDTA whole blood (1.5 ml) is isolated followed by the centrifugation of EDTA and serum tubes at  
21 2000xg and 4°C for 10 min. After centrifugation 2x2 ml EDTA plasma, 1x EDTA buffy coat and 4x2 ml  
22 serum are isolated. PAXgene blood RNA tubes are kept at room temperature for 2-72 hours, hereafter frozen  
23 at -20°C for 24-72 hours, and finally stored long term at -80°C. Whole blood and buffy coat are stored at ≤  
24 20°C; plasma and serum are stored at -80°C.  
25  
26  
27  
28  
29  
30  
31  
32  
33  
34

35 Synovial fluid is collected in EDTA tubes (9 ml) and centrifuged at 2000xg and 4°C for 10 min. The  
36 cell-free supernatant is transferred to 5 ml cryotubes and each cell-pellet is resuspended in 1 ml supernatant  
37 and pooled in 5 ml cryotubes. Sample processing results in: ≤20x5 ml cell-free synovial fluid and ≤2x5 ml  
38 cell-pellet, which are stored long term at -80°C.  
39  
40  
41  
42

43 Pre-analytical factors such as date and time of sampling, handling and storage, temperature during  
44 transportation, and the exact handling procedure are registered in the nationwide Bio- and Genome Bank  
45 Denmark registry. All samples are pseudonymised before storage.  
46  
47  
48  
49  
50

### 51 **Assay methods**

52 The protocol aims to investigate the following biomarkers in blood, synovial fluid, or tissue:  
53  
54  
55  
56  
57  
58

- 1) Genetic variation using Next Generation Sequencing (NGS) and Whole Genome Sequencing (WGS), and RNA and miRNA expression profiles
- 2) Protein biomarker profiles of inflammation, and bone- and cartilage-metabolism, using, e.g., the Multi Biomarker Disease Activity (MBDA) score (a panel of 12 proteins) [38] (Cresendo Bioscience Inc., South San Francisco, CA, USA), Proseek Multiplex protein arrays (panels of 92 proteins) (Olink Proteomics, Uppsala, Sweden, [www.olink.com](http://www.olink.com)), or proteomics platforms, such as mass spectrometry, protein-arrays, or multiplexed-ELISA
- 3) Metabolites using Nuclear Magnetic Resonance (NMR)-spectroscopy
- 4) ADAb against bDMARD and drug concentrations (e.g. IFX) using a target-based assay fully automated on the AutoDELFIA® (PerkinElmer, Waltham, MA, USA) immunoassay platform (Oslo University Hospital, Radiumhospitalet, Oslo, Norway)

All samples will be analysed in pseudonymised form to ensure blinded testing by the laboratory personnel. The list of specific diagnostic, prognostic, and predictive biomarkers will be updated continuously according to new discoveries. The methods for biomarker analysis are rapidly expanding and improving, and the best available method will be used at time of analysis.

### Statistical methods

For the longitudinal samples it is expected that the numbers collected during a 10-year period will provide sufficient statistical power to identify prognostic and predictive biomarkers if these are present among >10% of the patients. Knowledge within the field is still insufficient, thus, it is not possible to perform a comprehensive power calculation; this will, however, be performed before any biomarker analysis is done.

In general, statistical analyses will be done according to available data; the following statistical tests may be used (the list is not complete): comparison of group demographics will be done with Student's t-test, Pearson's chi-square test or Mann-Whitney U-test according to the distribution of data. Due to the large size of the dataset the probability for type II error in testing the hypothesis will be low. Treatment duration and time to event can be explored with Kaplan-Meier curves, log-rank statistics and Cox regression analyses. Treatment outcomes across groups or according to specific biomarkers will be analysed with logistic

1  
2  
3  
4 regression analyses. Multivariable analyses will be performed in order to study the impact of potential  
5  
6 confounders. These confounders may be identified in the DANBIO registry (gender, age, smoking status, or  
7  
8 other baseline characteristics). All included patients are recruited and treated in routine care across Denmark  
9  
10 and this will inevitably lead to some missing data (missing sampling of biological material, missing  
11  
12 registration of corresponding clinical data, whenever biological material is collected, patient lost to follow-  
13  
14 up, etc.). For sensitivity, various statistical methods may be applied in order to test the robustness of the  
15  
16 results. This may be done as last observation carried forward in case of lacking data on clinical outcomes,  
17  
18 non-responder imputation, or statistical multiple imputation of missing data. Statistical expertise will be  
19  
20 included when necessary.  
21  
22

### 23 **ETHICS AND DISSEMINATION**

24  
25 The protocol is approved by the Danish Ethics Committee (H-2-2014-086, supplementary protocol 49419)  
26  
27 and The Danish Data Protection Agency (RH-2015-297, I-Suite 04318). The Danish Rheumatologic Biobank  
28  
29 is approved by The Danish Data Protection Agency (GLO-2015-6, I-Suite 03490). All patients receive verbal  
30  
31 and written information before enrolment, and give oral and written consent at baseline according to the  
32  
33 guidelines from the Danish Ethics Committee. All patients are informed that they can withdraw from the  
34  
35 study at any time without it having consequences for their treatment. In case of withdrawal, samples are  
36  
37 discarded and all patient-related registrations deleted from the Bio- and Genome Bank Denmark registry.  
38

39  
40 The sampled volume of blood for the study is 26.5 ml per patient-visit and maximum 240 ml/year.  
41  
42 The sampling of blood for the study is performed simultaneously with scheduled routine blood sampling,  
43  
44 thus minimizing the discomfort for the patient. Synovial fluid, surgical tissue, or bone marrow will only be  
45  
46 collected if relevant interventions occur as part of routine care and surplus material, not used for diagnostic  
47  
48 or therapeutic purposes, is available. The patients will be contacted and informed regarding the overall study  
49  
50 results if they indicate interest in this in the patient study consent form. Direct feedback to the patient may be  
51  
52 relevant in case of the discovery of mutations in known disease-linked genes, or as random discoveries, and  
53  
54 will occur according to the guidelines directed by the Danish Ethics Committee (document number 1293688,  
55  
56 October 2013). The physician in charge of the project at the individual department is responsible for  
57  
58



1  
2  
3  
4 conducting the study in accordance with the Helsinki declaration. Study participation does not affect the  
5 treatment course of individual patients and the patients will be treated according to clinical practise.  
6

7  
8 Due to the large number of included patients, it will be possible to perform exploratory as well as  
9 validation biomarker studies. We plan to evaluate and publish study results according to the REMARK [13],  
10 STROBE [33], and the Standards for Reporting of Diagnostic Accuracy (STARD) [39] guidelines. Results  
11 will be published in international and peer-reviewed scientific journals and presented at international  
12 conferences. Negative, positive as well as inconclusive results will be published. If relevant, collaborations  
13 with international researchers will be established to facilitate the right expertise for biomarker analyses. The  
14 first results (measurements of s-IFX and ADA<sub>b</sub> drug levels up to one year after switch from originator to  
15 biosimilar IFX) have been presented [36,40].  
16  
17  
18  
19  
20  
21  
22  
23  
24

## 25 **STUDY STATUS**

26  
27 Patient recruitment started in May 2015 and is expected to continue until January 1<sup>st</sup>, 2025, with follow-up  
28 until January 1<sup>st</sup>, 2030. Currently, ≈3,000 patients have been enrolled in the study and >5,000 blood samples  
29 have been collected.  
30  
31  
32  
33  
34

## 35 **DISCUSSION AND POTENTIAL LIMITATIONS**

36  
37 In this observational, prospective, and translational biomarker study of patients with inflammatory rheumatic  
38 diseases, blood samples are collected in routine care and closely linked to extensive clinical data regarding  
39 rheumatic disease status and activity, medical treatment, treatment efficacy and adverse events, and  
40 comorbidities. The study protocol allows for a large-scale collection of blood and other biological materials  
41 with the aim to identify new biomarkers that can be used for improved personalized treatment of patients  
42 with inflammatory rheumatic diseases. Additionally, the nationwide collection of biological materials and  
43 clinical data is intended to further promote research collaboration within inflammatory rheumatic diseases,  
44 both nationally and internationally, in order to ensure research of the highest quality for the benefit of the  
45 patients.  
46  
47  
48  
49  
50  
51  
52  
53  
54  
55  
56  
57  
58



1  
2  
3  
4 Positivity for IgM-RF and anti-CCP are established risk factors for development of RA, and they are  
5 currently used as part of classification criteria and as prognostic markers [3]. In AxSpA, HLA-B27 is part of  
6 the disease classification [41]. Apart from the erythrocyte sedimentation rate and serum-CRP level, no  
7 biomarkers are used in routine care, and they cannot predict treatment responses or side effects. The wide  
8 range of currently available and future bDMARDs with different modes of action for the treatment of  
9 inflammatory arthritis, and the recent introduction of biosimilars and tsDMARDs, stresses the importance of  
10 improved ability to select the most effective treatment in the individual patient. Development of diagnostic,  
11 prognostic and predictive biomarkers will benefit the treatment of future patients and facilitate personalized  
12 medicine.  
13  
14  
15  
16  
17  
18  
19  
20

21 Patient recruitment and follow-up in routine care will lead to some limitations in clinical and  
22 biological data. Since patients are recruited across several rheumatic diagnoses and treatments, patient  
23 inclusion may take some time in order to obtain enough samples for a specific research question. However,  
24 since it is mandatory to register patients receiving biological treatment in DANBIO, coverage is high ( $\approx 96\%$ )  
25 [42] and the risk of selection bias low. The risks for the patient are minimal and are out-weighted by the  
26 benefits for future patients. The non-randomised study design inherits the risks of confounding, and thorough  
27 statistical analysis and confounder adjustment is therefore important. On the other hand, the wide recruitment  
28 of patients treated in routine care may provide valuable data on, e.g., elderly patients with comorbidities.  
29 This may be a valuable supplement to data generated in randomised trials.  
30  
31  
32  
33  
34  
35  
36  
37  
38

39 Hopefully, the results of the present study will provide us with new biomarkers that will improve our  
40 ability to a) diagnose rheumatic diseases more accurately and at an earlier stage, b) prognosticate the  
41 development of rheumatic diseases, and c) predict and monitor treatment effectiveness in the individual  
42 patient (personalized treatment).  
43  
44  
45  
46

47 The Danish Rheumatologic Biobank provides an infrastructure for national and international research  
48 collaboration. Thus, researchers, who are interested in collaboration regarding samples and/or clinical data  
49 from DANBIO should contact the Danish Rheumatologic Biobank [31] and DANBIO [30], respectively.  
50  
51  
52  
53  
54

## 55 **Funding**

56  
57  
58

1  
2  
3  
4 The Danish Rheumatism Association and Danish Regions funded the establishment of The Danish  
5 Rheumatologic Biobank. Danish Regions are funding the continued collection of biological samples and  
6 clinical data. The funders will have no influence on study design, data analysis, interpretation of results, or  
7 publications. Biomarker analyses will be funded by research grants.  
8  
9  
10

### 11 12 13 14 **Contributors**

15 MLH and JJ wrote the protocol for the Research Ethics Committee. MLH, JJ, EH, TK and BG contributed to  
16 study concept. TK and BG drafted and revised the manuscript after feedback from all authors. All authors  
17 contributed to review of the present manuscript and approved the final version of the manuscript.  
18  
19  
20  
21  
22

### 23 24 **Competing interests**

25 None  
26  
27  
28

### 29 30 **Provenance and peer review**

31 Not commissioned; externally peer review.  
32  
33  
34

### 35 36 **Acknowledgements**

37 The Danish Rheumatologic Biobank is acknowledged for handling and storage of biological material. Lab  
38 technician Teresa Rozenfeld and IT specialist Niels Steen Krogh are acknowledged for their assistance. The  
39 Biomarker Protocol Study Group, listed below, is acknowledged for their contribution to data registration or  
40 sample collection, and for review of the present manuscript: Asta Linauskas, North Denmark Regional  
41 Hospital; Gitte Meyer Larsen, North Denmark Regional Hospital; Anne Gitte Loft, Aarhus University  
42 Hospital; Charlotte Modin, Aarhus University Hospital; Karin Skovgaard, Aarhus University Hospital; Inge  
43 Juul Sørensen, Rigshospitalet; Britt Corfixen, Rigshospitalet; Oliver Hendricks, King Christian 10<sup>th</sup> Hospital  
44 for Rheumatic Diseases, Graasten; Charlotte Drachmann, King Christian 10<sup>th</sup> Hospital for Rheumatic  
45 Diseases, Graasten; Hanne Lindegaard, Odense University Hospital; Marina Bjørling-Poulsen, Odense  
46 University Hospital; Lene Dreyer, Copenhagen University Hospital, Gentofte; Johnny Raun, Hospital  
47  
48  
49  
50  
51  
52  
53  
54  
55  
56  
57  
58

1  
2  
3  
4 Lillebaelt, Kolding; Mikkel Østergaard, Rigshospitalet; Kim Hørslev-Petersen, King Christian 10<sup>th</sup> Hospital  
5 for Rheumatic Diseases, Graasten; Henning Bliddal, Frederiksberg Hospital; Claus Rasmussen, North  
6 Denmark Regional Hospital; Torkell Ellingsen, Odense University Hospital; Søren Jacobsen, Rigshospitalet;  
7  
8 Tove Lorenzen, Silkeborg Regional Hospital; Inger Marie Jensen Hansen, OUH Svendborg Hospital;  
9  
10 Annette Schlemmer, Aalborg University Hospital; Salome Kristensen, Aalborg University Hospital; Kristian  
11 Stengaard-Pedersen, Aarhus University Hospital; Michael Stoltenberg, Zealand University Hospital, Køge;  
12  
13 Henrik Nordin, Zealand University Hospital, Køge; Peter Mosborg, Randers Regional Hospital; Susanne  
14 Juhl Pedersen, Rigshospitalet; Christoffer Tandrup Nielsen, Rigshospitalet; Ellen-Margrethe Hauge, Aarhus  
15 University Hospital; Bent Deleuran, Aarhus University; Cecilie Brahe, Rigshospitalet; Christian Gytz  
16 Ammitzbøll, Aarhus University Hospital; Tue Wenzel Kragstrup, Aarhus University; Karen Carlsen, North  
17 Zealand University Hospital, Hillerød; Niklas Rye Jørgensen, Rigshospitalet; Dorte Vendelboe Jensen,  
18 Copenhagen University Hospital, Gentofte; Heidi Lausten Munk, Odense University Hospital; Michael  
19 Kruse Meyer, North Denmark Regional Hospital; and Tine Lottenburger, Hospital Lillebaelt, Vejle.  
20  
21  
22  
23  
24  
25  
26  
27  
28  
29  
30

## 31 REFERENCES

- 32  
33 1 Eriksson JK, Johansson K, Askling J, *et al.* Costs for hospital care, drugs and lost work days in  
34 incident and prevalent rheumatoid arthritis: how large, and how are they distributed? *Ann Rheum Dis*  
35 2015;**74**:648–54. doi:10.1136/annrheumdis-2013-204080  
36  
37
- 38  
39 2 Kiadaliri AA, Felson DT, Neogi T, *et al.* Rheumatoid arthritis as underlying cause of death in 31  
40 countries, 1987-2011: Trend analysis of WHO mortality database. *Arthritis Rheumatol (Hoboken, NJ)*  
41 2017;**69**:1560–5. doi:10.1002/art.40091  
42  
43
- 44  
45 3 Smolen JS, Landewé R, Bijlsma J, *et al.* EULAR recommendations for the management of  
46 rheumatoid arthritis with synthetic and biological disease-modifying antirheumatic drugs: 2016  
47 update. *Ann Rheum Dis* 2017;**76**:960–77. doi:10.1136/annrheumdis-2016-210715  
48  
49
- 50  
51 4 Smolen JS, Breedveld FC, Burmester GR, *et al.* Treating rheumatoid arthritis to target: 2014 update  
52 of the recommendations of an international task force. *Ann Rheum Dis* 2016;**75**:3–15.  
53  
54  
55 doi:10.1136/annrheumdis-2015-207524  
56  
57  
58

- 1  
2  
3  
4 5 Gossec L, Smolen JS, Ramiro S, *et al*. European League Against Rheumatism (EULAR)  
5  
6 recommendations for the management of psoriatic arthritis with pharmacological therapies: 2015  
7  
8 update. *Ann Rheum Dis* 2016;**75**:499–510. doi:10.1136/annrheumdis-2015-208337  
9  
10 6 Harnett J, Wiederkehr D, Gerber R, *et al*. Real-world evaluation of TNF-inhibitor utilization in  
11  
12 rheumatoid arthritis. *J Med Econ* 2016;**19**:91–102. doi:10.3111/13696998.2015.1099538  
13  
14 7 Hetland ML, Christensen IJ, Tarp U, *et al*. Direct comparison of treatment responses, remission rates,  
15  
16 and drug adherence in patients with rheumatoid arthritis treated with adalimumab, etanercept, or  
17  
18 infliximab: results from eight years of surveillance of clinical practice in the nationwide Danish  
19  
20 DANBIO registry. *Arthritis Rheum* 2010;**62**:22–32. doi:10.1002/art.27227  
21  
22 8 Isaacs JD, Ferraccioli G. The need for personalised medicine for rheumatoid arthritis. *Ann Rheum Dis*  
23  
24 2011;**70**:4–7. doi:10.1136/ard.2010.135376  
25  
26 9 Biomarkers Definitions Working Group. Biomarkers and surrogate endpoints: preferred definitions  
27  
28 and conceptual framework. *Clin Pharmacol Ther* 2001;**69**:89–95. doi:10.1067/mcp.2001.113989  
29  
30 10 Strimbu K, Tavel J a. What are Biomarkers? *Curr Opin HIV AIDS* 2011;**5**:463–6.  
31  
32 doi:10.1097/COH.0b013e32833ed177.What  
33  
34 11 Mohan C, Assassi S. Biomarkers in rheumatic diseases: how can they facilitate diagnosis and  
35  
36 assessment of disease activity? *BMJ* 2015;**351**:h5079. doi:10.1136/bmj.h5079  
37  
38 12 Churov A, Churov A V. MicroRNAs in rheumatoid arthritis: altered expression and diagnostic  
39  
40 potential. *Autoimmun Rev* 2015;**14**:1029–37.  
41  
42 13 Altman DG, McShane LM, Sauerbrei W, *et al*. Reporting Recommendations for Tumor Marker  
43  
44 Prognostic Studies (REMARK): explanation and elaboration. *PLoS Med* 2012;**9**:e1001216.  
45  
46 doi:10.1371/journal.pmed.1001216  
47  
48 14 Hayes DF. Biomarker validation and testing. *Mol Oncol* 2015;**9**:960–6.  
49  
50 doi:10.1016/j.molonc.2014.10.004  
51  
52 15 Saad MN, Mabrouk MS, Eldeib AM, *et al*. Identification of rheumatoid arthritis biomarkers based on  
53  
54 single nucleotide polymorphisms and haplotype blocks: A systematic review and meta-analysis. *J*  
55  
56 *Adv Res* 2016;**7**:1–16. doi:10.1016/j.jare.2015.01.008  
57  
58

- 1  
2  
3  
4 16 Chemin K, Klareskog L, Malmström V. Is rheumatoid arthritis an autoimmune disease? *Curr Opin Rheumatol* 2016;**28**:181–8. doi:10.1097/BOR.0000000000000253  
5  
6  
7  
8 17 Hwang S-H, Jung S-H, Lee S, *et al.* Leukocyte-specific protein 1 regulates T-cell migration in  
9  
10  
11  
12 18 Lee YH, Bae S-C, Seo YH, *et al.* Association between FCGR3B copy number variations and  
13  
14  
15  
16  
17  
18 19 Murata K, Yoshitomi H, Tanida S, *et al.* Plasma and synovial fluid microRNAs as potential  
19  
20  
21  
22  
23  
24 20 Vicente R, Noël D, Pers Y-M, *et al.* Deregulation and therapeutic potential of microRNAs in arthritic  
25  
26  
27  
28 21 Chen J-Q, Papp G, Szodoray P, *et al.* The role of microRNAs in the pathogenesis of autoimmune  
29  
30  
31  
32 22 Kruse Meyer M, Andersen M, Bennike TB, *et al.* Effect of IL-6R Inhibition with Tocilizumab on the  
33  
34  
35  
36  
37  
38 23 Bennike TB, Ellingsen T, Glerup H, *et al.* Proteome Analysis of Rheumatoid Arthritis Gut Mucosa. *J*  
39  
40  
41  
42 24 Ortea I, Roschitzki B, López-Rodríguez R, *et al.* Independent Candidate Serum Protein Biomarkers  
43  
44  
45  
46  
47  
48 25 Ortea I, Roschitzki B, Ovalles JG, *et al.* Discovery of serum proteomic biomarkers for prediction of  
49  
50  
51  
52  
53  
54 26 Guma M, Tiziani S, Firestein GS. Metabolomics in rheumatic diseases: desperately seeking  
55  
56  
57  
58  
59  
60

- 1  
2  
3  
4 27 Aletaha D, Neogi T, Silman AJ, *et al.* 2010 Rheumatoid arthritis classification criteria: an American  
5 College of Rheumatology/European League Against Rheumatism collaborative initiative. *Arthritis*  
6 *Rheum* 2010;**62**:2569–81. doi:10.1002/art.27584  
7  
8  
9  
10 28 Rudwaleit M, Taylor WJ. Classification criteria for psoriatic arthritis and ankylosing spondylitis/axial  
11 spondyloarthritis. *Best Pract Res Clin Rheumatol* 2010;**24**:589–604. doi:10.1016/j.berh.2010.05.007  
12  
13  
14 29 Sieper J, Rudwaleit M, Baraliakos X, *et al.* The Assessment of SpondyloArthritis international  
15 Society (ASAS) handbook: a guide to assess spondyloarthritis. *Ann Rheum Dis* 2009;**68 Suppl 2**:ii1-  
16 44. doi:10.1136/ard.2008.104018  
17  
18  
19  
20 30 DANBIO - Dansk reumatologisk database. www.danbio-online.dk (accessed 4 Jul 2017).  
21  
22 31 Danish Regions. Bio- and Genome Bank Denmark. <http://www.regioner.dk/rbgben> (accessed 4 Jul  
23 2017).  
24  
25  
26 32 Kringelbach TM, Glintborg B, Johansen J, *et al.* The nationwide Danish Rheumatologic Biobank –  
27 paving the road to personalized treatment of patients with inflammatory rheumatic diseases (Abstract  
28 no. EULAR16-2666). *Eur Leag Against Rheum - 17th Annu Eur Congr Rheumatol* 2016.  
29  
30  
31 33 Vandenbroucke JP, von Elm E, Altman DG, *et al.* Strengthening the Reporting of Observational  
32 Studies in Epidemiology (STROBE): Explanation and elaboration. *Int J Surg* 2014;**12**:1500–24.  
33  
34  
35  
36  
37 34 Ibfelt EH, Jensen DV, Hetland ML. The Danish nationwide clinical register for patients with  
38 rheumatoid arthritis: DANBIO. *Clin Epidemiol* 2016;**8**:737–42. doi:10.2147/CLEP.S99490  
39  
40  
41 35 Glintborg B, Sørensen IJ, Loft AG, *et al.* A nationwide non-medical switch from originator  
42 infliximab to biosimilar CT-P13 in 802 patients with inflammatory arthritis: 1-year clinical outcomes  
43 from the DANBIO registry. *Ann Rheum Dis* 2017;**76**:1426–31. doi:10.1136/annrheumdis-2016-  
44 210742  
45  
46  
47  
48  
49 36 Glintborg B, Kringelbach T, Bolstad N, *et al.* Drug concentrations and anti-drug antibodies during  
50 treatment with biosimilar infliximab (CT-P13) in routine care. *Accepted for publication in*  
51 *Scandinavian Journal of Rheumatology*, 2017.  
52  
53  
54  
55 37 Hetland ML, Jensen D V, Krogh NS. Monitoring patients with rheumatoid arthritis in routine care:  
56  
57  
58

- 1  
2  
3  
4 experiences from a treat-to-target strategy using the DANBIO registry. *Clin Exp Rheumatol*  
5  
6 2014;**32**:S-141-146.
- 7  
8 38 Li W, Sasso EH, van der Helm-van Mil AHM, *et al.* Relationship of multi-biomarker disease activity  
9  
10 score and other risk factors with radiographic progression in an observational study of patients with  
11  
12 rheumatoid arthritis. *Rheumatology* 2016;**55**:357–66. doi:10.1093/rheumatology/kev341
- 13  
14 39 Meyer GJ. Guidelines for reporting information in studies of diagnostic test accuracy: the STARD  
15  
16 initiative. *J Pers Assess* 2003;**81**:191–3. doi:10.1207/S15327752JPA8103\_01
- 17  
18 40 Glintborg B, Kringelbach TM, Høgdall EVS, *et al.* Non-Medical Switch from Originator to  
19  
20 Biosimilar Infliximab in Patients with Inflammatory Arthritis – Impact on s-Infliximab and Antidrug-  
21  
22 Antibodies. Results from the Danish Rheumatologic Biobank and the Danbio Registry [abstract no.:  
23  
24 1997]. *Arthritis Rheumatol.* 2016;**68**.
- 25  
26 41 Haroon M, Winchester R, Giles JT, *et al.* Clinical and genetic associations of radiographic sacroiliitis  
27  
28 and its different patterns in psoriatic arthritis. *Clin Exp Rheumatol* 2017;**35**:270–6.
- 29  
30 42 DANBIO. National Årsrapport 2015. 2016.
- 31  
32  
33  
34  
35  
36  
37  
38  
39  
40  
41  
42  
43  
44  
45  
46  
47  
48  
49  
50  
51  
52  
53  
54  
55  
56  
57  
58  
59  
60

## FIGURE LEGENDS

**Figure 1** Schematic presentation of study design and sampling strategies. Any patient diagnosed with RA, AxSpA, PsA, other inflammatory rheumatic disease or tissue disorder, or suspected for one of these, may participate when they meet for a scheduled routine clinical visit. These patients can provide one cross-sectional blood sample (**A**), or may be included for longitudinal follow-up (**B**) when they start treatment with a new DMARD (see text). See Figure 2 for details on blood handling and storage. Numbers (n) indicate patients potentially eligible for inclusion in one or more of the study arms.

**Figure 2** Standard Operating Procedure (SOP) for blood handling in the Danish Rheumatologic Biobank [31]. Peripheral blood is collected in one EDTA tube, two serum tubes, and one PAXgene blood RNA tube. Serum tubes coagulate at room temperature for 30 min to 2 hours. From the EDTA tube, 1.5 ml whole blood is isolated. EDTA and serum tubes are centrifuged at 2000xg and 4°C for 10 min. EDTA plasma (2x2ml), EDTA buffy coat and serum (4x2ml) are isolated. Processed blood samples are stored at ≤-20°C. PAXgene blood RNA tubes are kept at room temperature for 2-72 hours, then frozen at -20°C for 24-72 hours and stored at -80°C.



## A) Cross-sectional samples

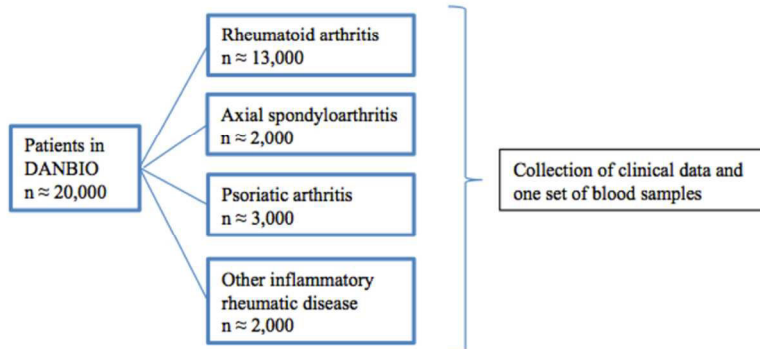

## B) Longitudinal samples

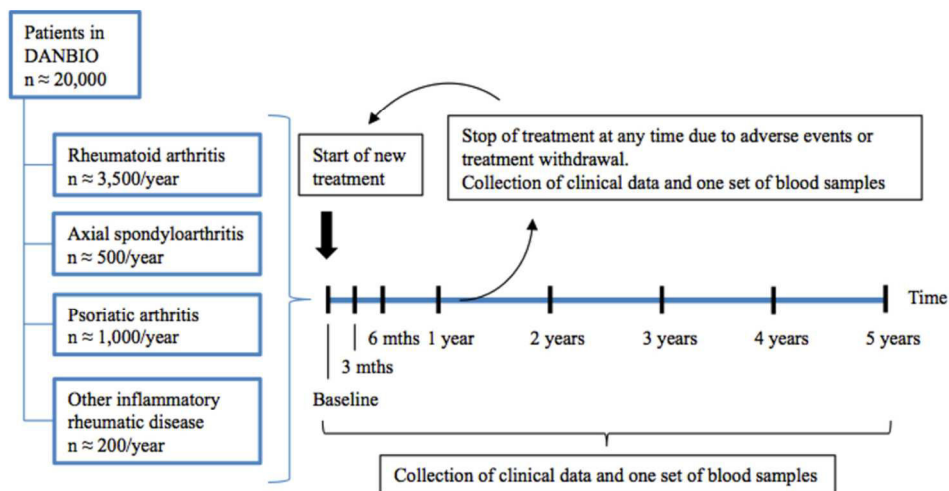

Figure 1 Schematic presentation of study design and sampling strategies. Any patient diagnosed with RA, AxSpA, PsA, other inflammatory rheumatic disease or tissue disorder, or suspected for one of these, may participate when they meet for a scheduled routine clinical visit. These patients can provide one cross-sectional blood sample (A), or may be included for longitudinal follow-up (B) when they start treatment with a new DMARD (see text). See Figure 2 for details on blood handling and storage. Numbers (n) indicate patients potentially eligible for inclusion in one or more of the study arms.

89x89mm (300 x 300 DPI)

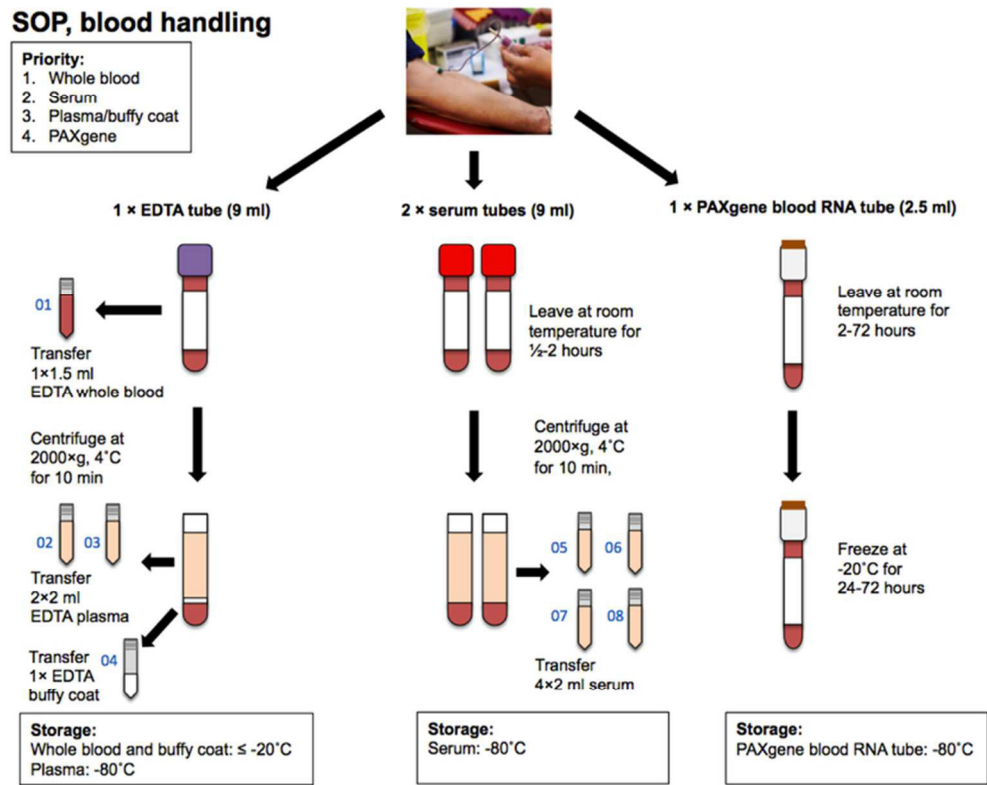

Figure 2 Standard Operating Procedure (SOP) for blood handling in the Danish Rheumatologic Biobank [31]. Peripheral blood is collected in one EDTA tube, two serum tubes, and one PAXgene blood RNA tube. Serum tubes coagulate at room temperature for 30 min to 2 hours. From the EDTA tube, 1.5 ml whole blood is isolated. EDTA and serum tubes are centrifuged at 2000xg and 4°C for 10 min. EDTA plasma (2x2ml), EDTA buffy coat and serum (4x2ml) are isolated. Processed blood samples are stored at ≤-20°C. PAXgene blood RNA tubes are kept at room temperature for 2-72 hours, then frozen at -20°C for 24-72 hours and stored at -80°C.

71x56mm (300 x 300 DPI)

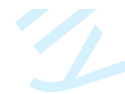

**STROBE 2007 (v4) Statement—Checklist of items that should be included in reports of cohort studies**

| Section/Topic             | Item # | Recommendation                                                                                                                                                                       | Reported on page #                                |
|---------------------------|--------|--------------------------------------------------------------------------------------------------------------------------------------------------------------------------------------|---------------------------------------------------|
| Title and abstract        | 1      | (a) Indicate the study’s design with a commonly used term in the title or the abstract                                                                                               | 1 and 2                                           |
|                           |        | (b) Provide in the abstract an informative and balanced summary of what was done and what was found                                                                                  | 2                                                 |
| <b>Introduction</b>       |        |                                                                                                                                                                                      |                                                   |
| Background/rationale      | 2      | Explain the scientific background and rationale for the investigation being reported                                                                                                 | 4-5                                               |
| Objectives                | 3      | State specific objectives, including any prespecified hypotheses                                                                                                                     | 5                                                 |
| <b>Methods</b>            |        |                                                                                                                                                                                      |                                                   |
| Study design              | 4      | Present key elements of study design early in the paper                                                                                                                              | 6-7                                               |
| Setting                   | 5      | Describe the setting, locations, and relevant dates, including periods of recruitment, exposure, follow-up, and data collection                                                      | 6-9                                               |
| Participants              | 6      | (a) Give the eligibility criteria, and the sources and methods of selection of participants. Describe methods of follow-up                                                           | 8                                                 |
|                           |        | (b) For matched studies, give matching criteria and number of exposed and unexposed                                                                                                  | Not relevant                                      |
| Variables                 | 7      | Clearly define all outcomes, exposures, predictors, potential confounders, and effect modifiers. Give diagnostic criteria, if applicable                                             | 7-8 and 10                                        |
| Data sources/ measurement | 8*     | For each variable of interest, give sources of data and details of methods of assessment (measurement). Describe comparability of assessment methods if there is more than one group | 9-10                                              |
| Bias                      | 9      | Describe any efforts to address potential sources of bias                                                                                                                            | 10                                                |
| Study size                | 10     | Explain how the study size was arrived at                                                                                                                                            | 8 + 10 and Fig 1                                  |
| Quantitative variables    | 11     | Explain how quantitative variables were handled in the analyses. If applicable, describe which groupings were chosen and why                                                         | (not relevant yet, the study is still recruiting) |
| Statistical methods       | 12     | (a) Describe all statistical methods, including those used to control for confounding                                                                                                | 10                                                |
|                           |        | (b) Describe any methods used to examine subgroups and interactions                                                                                                                  | 10                                                |
|                           |        | (c) Explain how missing data were addressed                                                                                                                                          | 10-11                                             |
|                           |        | (d) If applicable, explain how loss to follow-up was addressed                                                                                                                       | 10-11                                             |
|                           |        | (e) Describe any sensitivity analyses                                                                                                                                                | 10-11                                             |

| <b>Results</b>   |     |                                                                                                                                                                                                              |                                                   |
|------------------|-----|--------------------------------------------------------------------------------------------------------------------------------------------------------------------------------------------------------------|---------------------------------------------------|
| Participants     | 13* | (a) Report numbers of individuals at each stage of study—eg numbers potentially eligible, examined for eligibility, confirmed eligible, included in the study, completing follow-up, and analysed            | (not relevant yet, the study is still recruiting) |
|                  |     | (b) Give reasons for non-participation at each stage                                                                                                                                                         | (not relevant yet, the study is still recruiting) |
|                  |     | (c) Consider use of a flow diagram                                                                                                                                                                           | (not relevant yet, the study is still recruiting) |
| Descriptive data | 14* | (a) Give characteristics of study participants (eg demographic, clinical, social) and information on exposures and potential confounders                                                                     | (not relevant yet, the study is still recruiting) |
|                  |     | (b) Indicate number of participants with missing data for each variable of interest                                                                                                                          | (not relevant yet, the study is still recruiting) |
|                  |     | (c) Summarise follow-up time (eg, average and total amount)                                                                                                                                                  | (not relevant yet, the study is still recruiting) |
| Outcome data     | 15* | Report numbers of outcome events or summary measures over time                                                                                                                                               | (not relevant yet, the study is still recruiting) |
| Main results     | 16  | (a) Give unadjusted estimates and, if applicable, confounder-adjusted estimates and their precision (eg, 95% confidence interval). Make clear which confounders were adjusted for and why they were included | (not relevant yet, the study is still recruiting) |
|                  |     | (b) Report category boundaries when continuous variables were categorized                                                                                                                                    | (not relevant yet, the study is still recruiting) |
|                  |     | (c) If relevant, consider translating estimates of relative risk into absolute risk for a meaningful time period                                                                                             | (not relevant yet, the study is still recruiting) |

|                          |    |                                                                                                                                                                            |                                                   |
|--------------------------|----|----------------------------------------------------------------------------------------------------------------------------------------------------------------------------|---------------------------------------------------|
| Other analyses           | 17 | Report other analyses done—eg analyses of subgroups and interactions, and sensitivity analyses                                                                             | (not relevant yet, the study is still recruiting) |
| <b>Discussion</b>        |    |                                                                                                                                                                            |                                                   |
| Key results              | 18 | Summarise key results with reference to study objectives                                                                                                                   | (not relevant yet, the study is still recruiting) |
| <b>Limitations</b>       |    |                                                                                                                                                                            |                                                   |
| Interpretation           | 20 | Give a cautious overall interpretation of results considering objectives, limitations, multiplicity of analyses, results from similar studies, and other relevant evidence | (not relevant yet, the study is still recruiting) |
| Generalisability         | 21 | Discuss the generalisability (external validity) of the study results                                                                                                      | (not relevant yet, the study is still recruiting) |
| <b>Other information</b> |    |                                                                                                                                                                            |                                                   |
| Funding                  | 22 | Give the source of funding and the role of the funders for the present study and, if applicable, for the original study on which the present article is based              | 13                                                |

\*Give information separately for cases and controls in case-control studies and, if applicable, for exposed and unexposed groups in cohort and cross-sectional studies.

**Note:** An Explanation and Elaboration article discusses each checklist item and gives methodological background and published examples of transparent reporting. The STROBE checklist is best used in conjunction with this article (freely available on the Web sites of PLoS Medicine at <http://www.plosmedicine.org/>, Annals of Internal Medicine at <http://www.annals.org/>, and Epidemiology at <http://www.epidem.com/>). Information on the STROBE Initiative is available at [www.strobe-statement.org](http://www.strobe-statement.org).
